# Supplementary material
Source: PubMed Central journal article supplement (PMC6965943)
Supplement: ijcep0010-10009-f5.pdf [file ijcep0010-10009-f5.pdf]

## Transcriptome of primary aldosteronism adrenal glands

**Table S1.** Up-regulated genes in primary aldosteronism

| Rank | Gene name     | Fold change | P value | D1      | D2       | D3       | C1     | C2      | C3     |
|------|---------------|-------------|---------|---------|----------|----------|--------|---------|--------|
| 1    | ATAD3C        | 46.6845     | 0.0171  | 0.7813  | 2.9554   | 34.9760  | 0.8292 | 0.0000  | 0.0000 |
| 2    | ZC2HC1B       | 41.9095     | 0.0446  | 0.0000  | 4.4331   | 31.7964  | 0.0000 | 0.8645  | 0.0000 |
| 3    | PROM1         | 41.4890     | 0.0036  | 1.5627  | 8.8663   | 25.4371  | 0.0000 | 0.8645  | 0.0000 |
| 4    | LINC00664     | 41.3117     | 0.0044  | 12.5013 | 17.7326  | 0.0000   | 0.0000 | 0.0000  | 0.7318 |
| 5    | KCNB1         | 35.4931     | 0.0004  | 5.4693  | 36.9428  | 9.5389   | 0.0000 | 0.0000  | 1.4637 |
| 6    | IGLON5        | 34.0998     | 0.0087  | 0.7813  | 14.7771  | 12.7186  | 0.8292 | 0.0000  | 0.0000 |
| 7    | RP11-380L11.4 | 32.9287     | 0.0015  | 5.4693  | 5.9109   | 12.7186  | 0.0000 | 0.0000  | 0.7318 |
| 8    | TM4SF4        | 32.9287     | 0.0015  | 5.4693  | 5.9109   | 12.7186  | 0.0000 | 0.0000  | 0.7318 |
| 9    | SCRT1         | 32.1499     | 0.0029  | 2.3440  | 14.7771  | 9.5389   | 0.8292 | 0.0000  | 0.0000 |
| 10   | CDH1          | 32.0383     | 0.0370  | 0.7813  | 1.4777   | 25.4371  | 0.0000 | 0.8645  | 0.0000 |
| 11   | RP1-69D17.3   | 30.2225     | 0.0306  | 1.5627  | 1.4777   | 19.0778  | 0.0000 | 0.0000  | 0.7318 |
| 12   | HOXC9         | 27.7151     | 0.0027  | 2.3440  | 8.1274   | 54.0539  | 0.0000 | 0.8645  | 1.4637 |
| 13   | TCL1A         | 27.3733     | 0.0092  | 1.5627  | 14.7771  | 6.3593   | 0.8292 | 0.0000  | 0.0000 |
| 14   | SV2C          | 26.7295     | 0.0114  | 2.3440  | 14.0383  | 3.1796   | 0.0000 | 0.0000  | 0.7318 |
| 15   | RP11-348H3.2  | 25.5858     | 0.0344  | 1.5627  | 1.4777   | 19.0778  | 0.0000 | 0.8645  | 0.0000 |
| 16   | MB            | 25.1747     | 0.0042  | 8.5947  | 6.6497   | 3.1796   | 0.0000 | 0.0000  | 0.7318 |
| 17   | RP5-1021I20.2 | 24.0022     | 0.0066  | 2.3440  | 8.8663   | 9.5389   | 0.0000 | 0.8645  | 0.0000 |
| 18   | CD79A         | 22.9409     | 0.0179  | 10.1573 | 8.8663   | 0.0000   | 0.8292 | 0.0000  | 0.0000 |
| 19   | ACSM2A        | 21.9568     | 0.0483  | 2.3440  | 0.7389   | 15.8982  | 0.0000 | 0.8645  | 0.0000 |
| 20   | RP11-540A21.2 | 21.9077     | 0.0427  | 1.5627  | 1.4777   | 15.8982  | 0.0000 | 0.8645  | 0.0000 |
| 21   | SLC25A41      | 21.7466     | 0.0159  | 3.1253  | 2.9554   | 12.7186  | 0.0000 | 0.8645  | 0.0000 |
| 22   | LINC00842     | 19.4911     | 0.0292  | 10.9387 | 5.9109   | 0.0000   | 0.0000 | 0.8645  | 0.0000 |
| 23   | C1orf186      | 19.3075     | 0.0412  | 7.0320  | 0.7389   | 6.3593   | 0.0000 | 0.0000  | 0.7318 |
| 24   | CTD-2576D5.4  | 19.3075     | 0.0412  | 7.0320  | 0.7389   | 6.3593   | 0.0000 | 0.0000  | 0.7318 |
| 25   | NEURL1        | 18.6808     | 0.0001  | 7.8133  | 26.5988  | 12.7186  | 1.6585 | 0.8645  | 0.0000 |
| 26   | MIRLET7DHG    | 18.2149     | 0.0338  | 0.7813  | 2.2166   | 25.4371  | 0.8292 | 0.0000  | 0.7318 |
| 27   | PRAME         | 18.1746     | 0.0073  | 6.2507  | 2.2166   | 34.9760  | 1.6585 | 0.0000  | 0.7318 |
| 28   | KIAA1644      | 17.8406     | 0.0003  | 5.4693  | 23.6434  | 15.8982  | 1.6585 | 0.8645  | 0.0000 |
| 29   | CMTM5         | 17.5691     | 0.0447  | 5.4693  | 7.3886   | 0.0000   | 0.0000 | 0.0000  | 0.7318 |
| 30   | PLEKHB1       | 17.0321     | 0.0008  | 12.5013 | 72.4080  | 15.8982  | 0.0000 | 5.1868  | 0.7318 |
| 31   | RAMP1         | 16.8890     | 0.0000  | 32.0346 | 130.0388 | 101.7485 | 3.3170 | 8.6447  | 3.6592 |
| 32   | AC004069.2    | 16.3100     | 0.0418  | 2.3440  | 2.2166   | 9.5389   | 0.0000 | 0.8645  | 0.0000 |
| 33   | CRABP1        | 15.9249     | 0.0457  | 8.5947  | 5.1720   | 0.0000   | 0.0000 | 0.8645  | 0.0000 |
| 34   | MYBPC1        | 15.7775     | 0.0439  | 6.2507  | 7.3886   | 0.0000   | 0.0000 | 0.8645  | 0.0000 |
| 35   | MYOM1         | 15.3843     | 0.0000  | 73.4453 | 63.5417  | 232.1137 | 6.6339 | 12.9671 | 4.3911 |
| 36   | ADIPOQ        | 14.5844     | 0.0000  | 57.0373 | 79.7965  | 9.5389   | 3.3170 | 0.8645  | 5.8548 |
| 37   | PRDM8         | 14.1741     | 0.0071  | 16.4080 | 18.4714  | 0.0000   | 0.0000 | 1.7289  | 0.7318 |
| 38   | TCF15         | 14.1673     | 0.0052  | 7.0320  | 3.6943   | 22.2575  | 0.0000 | 0.8645  | 1.4637 |
| 39   | CXCR2         | 14.1657     | 0.0382  | 3.1253  | 0.7389   | 28.6168  | 0.8292 | 0.0000  | 1.4637 |
| 40   | RP11-797A18.4 | 13.9485     | 0.0493  | 1.5627  | 2.9554   | 15.8982  | 0.0000 | 0.0000  | 1.4637 |
| 41   | PABPN1L       | 13.7754     | 0.0014  | 50.0053 | 9.6051   | 6.3593   | 0.0000 | 2.5934  | 2.1955 |
| 42   | LRRC4B        | 13.4370     | 0.0030  | 5.4693  | 28.8154  | 6.3593   | 0.8292 | 0.0000  | 2.1955 |
| 43   | SCGB2A1       | 12.6185     | 0.0129  | 3.9067  | 3.6943   | 31.7964  | 1.6585 | 0.0000  | 1.4637 |
| 44   | CIDEA         | 12.6129     | 0.0118  | 10.9387 | 19.2103  | 0.0000   | 1.6585 | 0.0000  | 0.7318 |
| 45   | C19orf35      | 12.3534     | 0.0462  | 2.3440  | 1.4777   | 15.8982  | 0.0000 | 0.8645  | 0.7318 |
| 46   | C14orf180     | 12.3178     | 0.0010  | 30.4720 | 14.7771  | 6.3593   | 0.0000 | 3.4579  | 0.7318 |
| 47   | MIR3648       | 12.0648     | 0.0398  | 4.6880  | 0.7389   | 25.4371  | 0.8292 | 1.7289  | 0.0000 |
| 48   | LHB           | 11.7551     | 0.0363  | 2.3440  | 4.4331   | 12.7186  | 1.6585 | 0.0000  | 0.0000 |
| 49   | GPR97         | 11.7532     | 0.0493  | 6.2507  | 0.0000   | 22.2575  | 0.8292 | 0.8645  | 0.7318 |

## Transcriptome of primary aldosteronism adrenal glands

|     |               |         |        |          |          |          |         |         |         |
|-----|---------------|---------|--------|----------|----------|----------|---------|---------|---------|
| 50  | FOLR1         | 11.7308 | 0.0003 | 21.8773  | 17.7326  | 9.5389   | 0.0000  | 3.4579  | 0.7318  |
| 51  | RP5-857K21.7  | 11.6931 | 0.0374 | 2.3440   | 0.7389   | 34.9760  | 1.6585  | 0.8645  | 0.7318  |
| 52  | MPP2          | 11.2427 | 0.0017 | 6.2507   | 40.6371  | 9.5389   | 0.8292  | 3.4579  | 0.7318  |
| 53  | MAP7D2        | 11.2405 | 0.0041 | 14.0640  | 21.4268  | 0.0000   | 0.8292  | 0.8645  | 1.4637  |
| 54  | CIDEC         | 11.1910 | 0.0114 | 42.1920  | 26.5988  | 0.0000   | 2.4877  | 0.0000  | 3.6592  |
| 55  | RND1          | 10.8981 | 0.0399 | 2.3440   | 2.2166   | 22.2575  | 0.0000  | 1.7289  | 0.7318  |
| 56  | IGKV3-20      | 10.8584 | 0.0281 | 6.2507   | 11.0829  | 0.0000   | 0.0000  | 0.8645  | 0.7318  |
| 57  | PPFIA4        | 10.8264 | 0.0168 | 1.5627   | 14.7771  | 9.5389   | 1.6585  | 0.0000  | 0.7318  |
| 58  | PCK1          | 10.7372 | 0.0000 | 36.7226  | 44.3314  | 6.3593   | 2.4877  | 3.4579  | 2.1955  |
| 59  | AJAP1         | 10.5921 | 0.0035 | 6.2507   | 8.1274   | 12.7186  | 0.8292  | 1.7289  | 0.0000  |
| 60  | CTD-2619J13.8 | 10.0902 | 0.0263 | 2.3440   | 4.4331   | 25.4371  | 0.0000  | 1.7289  | 1.4637  |
| 61  | RP11-678G14.3 | 9.8887  | 0.0221 | 42.9733  | 66.4971  | 0.0000   | 0.8292  | 9.5092  | 0.7318  |
| 62  | TPPP3         | 9.7983  | 0.0000 | 21.8773  | 73.8857  | 15.8982  | 4.1462  | 4.3224  | 2.9274  |
| 63  | S100A9        | 9.7059  | 0.0000 | 60.9439  | 64.2805  | 365.6586 | 14.9264 | 22.4762 | 13.1733 |
| 64  | FOXO6         | 9.6411  | 0.0232 | 12.5013  | 9.6051   | 0.0000   | 0.8292  | 0.0000  | 1.4637  |
| 65  | KRT8P3        | 9.5632  | 0.0215 | 7.0320   | 8.8663   | 25.4371  | 0.0000  | 4.3224  | 0.0000  |
| 66  | ABCC6         | 9.5311  | 0.0002 | 14.8453  | 14.7771  | 44.5150  | 1.6585  | 1.7289  | 4.3911  |
| 67  | SEC14L4       | 9.4361  | 0.0111 | 13.2827  | 9.6051   | 0.0000   | 0.8292  | 0.8645  | 0.7318  |
| 68  | ARC           | 9.3407  | 0.0007 | 6.2507   | 49.5034  | 28.6168  | 4.9755  | 2.5934  | 1.4637  |
| 69  | CTC-332L22.1  | 9.2137  | 0.0483 | 1.5627   | 4.4331   | 28.6168  | 0.8292  | 0.0000  | 2.9274  |
| 70  | MYPN          | 9.1618  | 0.0045 | 26.5653  | 5.9109   | 9.5389   | 1.6585  | 0.0000  | 2.9274  |
| 71  | SAA1          | 9.1487  | 0.0000 | 91.4159  | 117.4782 | 25.4371  | 10.7802 | 6.0513  | 8.7822  |
| 72  | PPAP2C        | 9.0366  | 0.0043 | 31.2533  | 9.6051   | 79.4910  | 7.4632  | 0.0000  | 5.8548  |
| 73  | RP11-403A21.2 | 8.9144  | 0.0415 | 2.3440   | 3.6943   | 15.8982  | 0.0000  | 1.7289  | 0.7318  |
| 74  | CHADL         | 8.9061  | 0.0000 | 23.4400  | 19.9491  | 44.5150  | 2.4877  | 5.1868  | 2.1955  |
| 75  | RP11-416N2.4  | 8.8752  | 0.0486 | 4.6880   | 10.3440  | 0.0000   | 0.8292  | 0.8645  | 0.0000  |
| 76  | RADIL         | 8.8281  | 0.0407 | 5.4693   | 16.2548  | 0.0000   | 0.0000  | 1.7289  | 0.7318  |
| 77  | NTSR2         | 8.7489  | 0.0271 | 7.8133   | 23.6434  | 6.3593   | 0.0000  | 4.3224  | 0.0000  |
| 78  | RP11-73M18.9  | 8.7120  | 0.0158 | 9.3760   | 2.2166   | 9.5389   | 0.8292  | 0.8645  | 0.7318  |
| 79  | RP3-467K16.4  | 8.5789  | 0.0337 | 3.1253   | 2.2166   | 47.6946  | 1.6585  | 0.8645  | 3.6592  |
| 80  | CECR2         | 8.5643  | 0.0468 | 8.5947   | 5.9109   | 0.0000   | 0.8292  | 0.8645  | 0.0000  |
| 81  | RSPH1         | 8.4308  | 0.0043 | 3.1253   | 15.5160  | 22.2575  | 1.6585  | 1.7289  | 1.4637  |
| 82  | CTD-2319I12.1 | 8.3340  | 0.0179 | 5.4693   | 30.2931  | 6.3593   | 0.0000  | 4.3224  | 0.7318  |
| 83  | RP11-475I24.3 | 8.3090  | 0.0499 | 4.6880   | 2.2166   | 6.3593   | 0.0000  | 0.8645  | 0.7318  |
| 84  | OGDHL         | 8.2199  | 0.0025 | 13.2827  | 100.4845 | 133.5449 | 2.4877  | 22.4762 | 5.1229  |
| 85  | SLC13A5       | 8.1584  | 0.0077 | 20.3146  | 9.6051   | 3.1796   | 0.0000  | 2.5934  | 1.4637  |
| 86  | TDRD9         | 8.1441  | 0.0135 | 17.1893  | 9.6051   | 0.0000   | 0.8292  | 1.7289  | 0.7318  |
| 87  | GIPR          | 8.1382  | 0.0401 | 4.6880   | 2.2166   | 19.0778  | 0.0000  | 1.7289  | 1.4637  |
| 88  | SCNN1B        | 8.1249  | 0.0374 | 3.9067   | 2.9554   | 19.0778  | 0.0000  | 1.7289  | 1.4637  |
| 89  | IL6           | 8.1183  | 0.0122 | 15.6267  | 11.0829  | 0.0000   | 0.8292  | 1.7289  | 0.7318  |
| 90  | RASD2         | 8.0886  | 0.0066 | 10.1573  | 36.2040  | 6.3593   | 0.0000  | 4.3224  | 2.1955  |
| 91  | CTC-786C10.1  | 8.0804  | 0.0397 | 13.2827  | 7.3886   | 0.0000   | 0.8292  | 1.7289  | 0.0000  |
| 92  | RP1-214M20.2  | 8.0754  | 0.0025 | 21.0960  | 24.3823  | 66.7724  | 0.0000  | 9.5092  | 4.3911  |
| 93  | CACNA1A       | 8.0649  | 0.0036 | 5.4693   | 36.2040  | 9.5389   | 0.8292  | 2.5934  | 2.9274  |
| 94  | PRRT3-AS1     | 7.9611  | 0.0308 | 5.4693   | 2.9554   | 22.2575  | 1.6585  | 0.0000  | 2.1955  |
| 95  | KRT8          | 7.8556  | 0.0029 | 185.1758 | 96.0514  | 642.2873 | 6.6339  | 93.3629 | 17.5643 |
| 96  | CSF3          | 7.8191  | 0.0320 | 9.3760   | 0.7389   | 41.3353  | 1.6585  | 3.4579  | 1.4637  |
| 97  | CXCR3         | 7.7811  | 0.0496 | 3.1253   | 3.6943   | 6.3593   | 0.8292  | 0.8645  | 0.0000  |
| 98  | STRA6         | 7.7520  | 0.0125 | 3.9067   | 35.4651  | 38.1557  | 4.1462  | 0.0000  | 5.8548  |
| 99  | SCGN          | 7.7110  | 0.0021 | 14.8453  | 42.1148  | 6.3593   | 0.8292  | 5.1868  | 2.1955  |
| 100 | TTBK1         | 7.7029  | 0.0360 | 3.9067   | 14.7771  | 0.0000   | 0.8292  | 0.8645  | 0.7318  |
| 101 | MMP11         | 7.6611  | 0.0100 | 11.7200  | 2.9554   | 47.6946  | 2.4877  | 3.4579  | 2.1955  |

## Transcriptome of primary aldosteronism adrenal glands

|     |               |        |        |          |          |          |         |         |         |
|-----|---------------|--------|--------|----------|----------|----------|---------|---------|---------|
| 102 | DUSP2         | 7.6353 | 0.0042 | 20.3146  | 8.8663   | 114.4670 | 3.3170  | 10.3737 | 5.1229  |
| 103 | MFSD2A        | 7.5227 | 0.0134 | 1.5627   | 26.5988  | 19.0778  | 2.4877  | 0.8645  | 2.9274  |
| 104 | SLC19A3       | 7.3607 | 0.0112 | 13.2827  | 22.1657  | 0.0000   | 2.4877  | 0.8645  | 1.4637  |
| 105 | SLPI          | 7.3517 | 0.0005 | 58.5999  | 11.8217  | 98.5688  | 9.9509  | 8.6447  | 4.3911  |
| 106 | CPXM1         | 7.3394 | 0.0003 | 46.8800  | 16.9937  | 114.4670 | 4.1462  | 12.1026 | 8.0503  |
| 107 | SLC29A4       | 7.2856 | 0.0090 | 14.0640  | 48.0257  | 12.7186  | 2.4877  | 7.7802  | 0.0000  |
| 108 | REEP2         | 7.2677 | 0.0005 | 8.5947   | 39.8983  | 44.5150  | 2.4877  | 5.1868  | 5.1229  |
| 109 | GGT6          | 7.1859 | 0.0117 | 10.1573  | 9.6051   | 3.1796   | 0.0000  | 1.7289  | 1.4637  |
| 110 | UHRF1         | 7.1296 | 0.0182 | 10.1573  | 13.2994  | 0.0000   | 0.8292  | 1.7289  | 0.7318  |
| 111 | RDH16         | 7.1243 | 0.0275 | 11.7200  | 1.4777   | 15.8982  | 2.4877  | 0.8645  | 0.7318  |
| 112 | SEMA3B-AS1    | 6.9143 | 0.0099 | 22.6586  | 28.8154  | 0.0000   | 1.6585  | 4.3224  | 1.4637  |
| 113 | HBA1          | 6.8717 | 0.0087 | 10.9387  | 5.9109   | 34.9760  | 2.4877  | 4.3224  | 0.7318  |
| 114 | P2RX5-TAX1BP3 | 6.8520 | 0.0367 | 3.9067   | 8.8663   | 3.1796   | 0.0000  | 0.8645  | 1.4637  |
| 115 | C10orf82      | 6.8115 | 0.0242 | 88.2906  | 31.0320  | 0.0000   | 2.4877  | 12.1026 | 2.9274  |
| 116 | PALM2         | 6.7297 | 0.0034 | 35.1600  | 56.1531  | 104.9281 | 0.8292  | 22.4762 | 5.8548  |
| 117 | MBL1P         | 6.6316 | 0.0136 | 31.2533  | 10.3440  | 25.4371  | 0.0000  | 8.6447  | 1.4637  |
| 118 | LINC01057     | 6.6218 | 0.0076 | 17.1893  | 6.6497   | 12.7186  | 0.0000  | 2.5934  | 2.9274  |
| 119 | IGHA1         | 6.5999 | 0.0004 | 53.1306  | 79.0577  | 22.2575  | 3.3170  | 16.4249 | 3.6592  |
| 120 | TMEM179       | 6.5814 | 0.0059 | 50.7866  | 66.4971  | 6.3593   | 0.8292  | 12.1026 | 5.8548  |
| 121 | KRT18         | 6.5745 | 0.0144 | 30.4720  | 22.1657  | 89.0299  | 0.0000  | 16.4249 | 5.1229  |
| 122 | PON1          | 6.5677 | 0.0112 | 39.0666  | 6.6497   | 31.7964  | 0.8292  | 9.5092  | 1.4637  |
| 123 | CXCL14        | 6.5501 | 0.0000 | 19.5333  | 34.7263  | 66.7724  | 4.9755  | 6.9158  | 6.5866  |
| 124 | FMN2          | 6.4476 | 0.0081 | 32.0346  | 91.6182  | 50.8742  | 0.0000  | 19.0184 | 8.0503  |
| 125 | MT1A          | 6.4472 | 0.0091 | 19.5333  | 41.3760  | 3.1796   | 0.8292  | 6.9158  | 2.1955  |
| 126 | HAP1          | 6.3016 | 0.0103 | 3.1253   | 16.9937  | 15.8982  | 1.6585  | 2.5934  | 1.4637  |
| 127 | FSD1          | 6.1862 | 0.0139 | 6.2507   | 5.9109   | 12.7186  | 0.8292  | 1.7289  | 1.4637  |
| 128 | RANGRF        | 6.1224 | 0.0484 | 7.0320   | 1.4777   | 15.8982  | 1.6585  | 0.8645  | 1.4637  |
| 129 | CAS8          | 6.1065 | 0.0147 | 14.8453  | 33.2486  | 0.0000   | 2.4877  | 1.7289  | 3.6592  |
| 130 | GPR176        | 6.0573 | 0.0063 | 8.5947   | 56.8920  | 31.7964  | 0.8292  | 8.6447  | 6.5866  |
| 131 | TPBGL         | 6.0109 | 0.0426 | 3.9067   | 18.4714  | 3.1796   | 1.6585  | 2.5934  | 0.0000  |
| 132 | GALNT6        | 6.0034 | 0.0230 | 8.5947   | 22.1657  | 3.1796   | 0.0000  | 3.4579  | 2.1955  |
| 133 | MT1G          | 5.9126 | 0.0018 | 15.6267  | 11.0829  | 15.8982  | 4.1462  | 0.8645  | 2.1955  |
| 134 | MT1X          | 5.7842 | 0.0051 | 32.0346  | 50.9811  | 295.7065 | 13.2679 | 39.7657 | 12.4414 |
| 135 | PTGFR         | 5.6369 | 0.0460 | 66.4133  | 120.4336 | 0.0000   | 2.4877  | 23.3407 | 7.3185  |
| 136 | GPR68         | 5.6163 | 0.0194 | 5.4693   | 22.9046  | 3.1796   | 0.8292  | 2.5934  | 2.1955  |
| 137 | LYPD3         | 5.6010 | 0.0048 | 35.1600  | 77.5800  | 9.5389   | 5.8047  | 13.8315 | 2.1955  |
| 138 | ADCY2         | 5.4982 | 0.0299 | 17.1893  | 33.2486  | 0.0000   | 1.6585  | 6.0513  | 1.4637  |
| 139 | CTSW          | 5.4971 | 0.0336 | 10.1573  | 11.8217  | 69.9521  | 0.8292  | 12.9671 | 2.9274  |
| 140 | NACAD         | 5.4860 | 0.0247 | 14.8453  | 47.2868  | 0.0000   | 5.8047  | 2.5934  | 2.9274  |
| 141 | KIAA1324      | 5.4518 | 0.0373 | 8.5947   | 42.8537  | 0.0000   | 3.3170  | 1.7289  | 4.3911  |
| 142 | LRG1          | 5.4471 | 0.0479 | 4.6880   | 3.6943   | 9.5389   | 0.8292  | 1.7289  | 0.7318  |
| 143 | GABRB3        | 5.4335 | 0.0313 | 16.4080  | 66.4971  | 0.0000   | 2.4877  | 6.9158  | 5.8548  |
| 144 | RIMS4         | 5.4285 | 0.0414 | 7.8133   | 13.2994  | 0.0000   | 0.8292  | 0.8645  | 2.1955  |
| 145 | RP11-509E16.1 | 5.3975 | 0.0062 | 10.1573  | 24.3823  | 85.8503  | 4.1462  | 8.6447  | 9.5140  |
| 146 | RAPSN         | 5.3431 | 0.0492 | 24.2213  | 6.6497   | 0.0000   | 3.3170  | 1.7289  | 0.7318  |
| 147 | LINC00693     | 5.3430 | 0.0421 | 3.1253   | 15.5160  | 3.1796   | 2.4877  | 0.8645  | 0.7318  |
| 148 | ADRA2C        | 5.3378 | 0.0014 | 30.4720  | 13.2994  | 31.7964  | 3.3170  | 8.6447  | 2.1955  |
| 149 | RP11-303E16.2 | 5.3344 | 0.0027 | 14.8453  | 14.7771  | 57.2335  | 4.9755  | 6.9158  | 4.3911  |
| 150 | RP11-89K11.1  | 5.2190 | 0.0335 | 6.2507   | 6.6497   | 34.9760  | 1.6585  | 6.0513  | 1.4637  |
| 151 | CREB5         | 5.1678 | 0.0095 | 7.0320   | 46.5480  | 19.0778  | 2.4877  | 8.6447  | 2.9274  |
| 152 | COCH          | 5.1662 | 0.0222 | 100.7919 | 56.8920  | 3.1796   | 7.4632  | 20.7473 | 2.9274  |
| 153 | GC            | 5.1600 | 0.0308 | 10.9387  | 2.9554   | 28.6168  | 3.3170  | 3.4579  | 1.4637  |

## Transcriptome of primary aldosteronism adrenal glands

|     |               |        |        |           |          |           |          |          |         |
|-----|---------------|--------|--------|-----------|----------|-----------|----------|----------|---------|
| 154 | NPFFR1        | 5.1324 | 0.0325 | 18.7520   | 11.0829  | 0.0000    | 2.4877   | 2.5934   | 0.7318  |
| 155 | ADAP1         | 5.0751 | 0.0104 | 19.5333   | 5.1720   | 12.7186   | 3.3170   | 2.5934   | 1.4637  |
| 156 | SLC25A34      | 5.0742 | 0.0015 | 107.8239  | 31.0320  | 25.4371   | 4.9755   | 16.4249  | 10.9777 |
| 157 | ATP1A2        | 5.0533 | 0.0174 | 51.5679   | 67.9748  | 0.0000    | 8.2924   | 9.5092   | 5.8548  |
| 158 | BRSK2         | 5.0441 | 0.0217 | 55.4746   | 43.5925  | 3.1796    | 4.9755   | 13.8315  | 1.4637  |
| 159 | C19orf81      | 5.0246 | 0.0011 | 22.6586   | 15.5160  | 28.6168   | 3.3170   | 7.7802   | 2.1955  |
| 160 | DSG2          | 4.9987 | 0.0282 | 9.3760    | 8.8663   | 6.3593    | 0.0000   | 3.4579   | 1.4637  |
| 161 | CCR10         | 4.9844 | 0.0264 | 6.2507    | 6.6497   | 15.8982   | 3.3170   | 1.7289   | 0.7318  |
| 162 | FAM101A       | 4.9768 | 0.0099 | 14.0640   | 10.3440  | 6.3593    | 1.6585   | 0.8645   | 3.6592  |
| 163 | CCDC153       | 4.9579 | 0.0365 | 7.8133    | 3.6943   | 12.7186   | 0.8292   | 2.5934   | 1.4637  |
| 164 | P2RX6         | 4.9539 | 0.0024 | 28.1280   | 26.5988  | 6.3593    | 2.4877   | 6.9158   | 2.9274  |
| 165 | ARHGEF4       | 4.9453 | 0.0043 | 35.9413   | 33.9874  | 3.1796    | 5.8047   | 6.0513   | 2.9274  |
| 166 | FOSL1         | 4.9269 | 0.0112 | 15.6267   | 16.9937  | 98.5688   | 4.1462   | 12.9671  | 9.5140  |
| 167 | PXMP2         | 4.8795 | 0.0235 | 5.4693    | 7.3886   | 19.0778   | 2.4877   | 2.5934   | 1.4637  |
| 168 | SGPP2         | 4.8685 | 0.0015 | 32.0346   | 53.1977  | 15.8982   | 4.1462   | 12.9671  | 3.6592  |
| 169 | SCN11A        | 4.8488 | 0.0286 | 5.4693    | 15.5160  | 3.1796    | 1.6585   | 2.5934   | 0.7318  |
| 170 | PPP1R1A       | 4.8183 | 0.0458 | 12.5013   | 16.9937  | 3.1796    | 1.6585   | 0.0000   | 5.1229  |
| 171 | ANO3          | 4.8072 | 0.0279 | 10.1573   | 30.2931  | 3.1796    | 0.8292   | 6.0513   | 2.1955  |
| 172 | IL1RL1        | 4.7800 | 0.0056 | 246.9011  | 195.7970 | 44.5150   | 9.9509   | 70.0222  | 21.9554 |
| 173 | PTH1R         | 4.7769 | 0.0003 | 458.6422  | 292.5873 | 1061.9998 | 82.0950  | 216.9822 | 80.5032 |
| 174 | DGAT2         | 4.7690 | 0.0097 | 10.1573   | 26.5988  | 6.3593    | 1.6585   | 5.1868   | 2.1955  |
| 175 | RASGEF1A      | 4.7602 | 0.0114 | 36.7226   | 16.2548  | 9.5389    | 0.8292   | 8.6447   | 3.6592  |
| 176 | NTNG2         | 4.7477 | 0.0002 | 59.3813   | 26.5988  | 98.5688   | 14.9264  | 12.9671  | 10.9777 |
| 177 | KRT7          | 4.7431 | 0.0073 | 16.4080   | 13.2994  | 41.3353   | 7.4632   | 6.0513   | 1.4637  |
| 178 | S100A13       | 4.7415 | 0.0063 | 37.5040   | 48.7645  | 260.7305  | 16.5849  | 39.7657  | 16.8325 |
| 179 | DPYSL4        | 4.7406 | 0.0256 | 8.5947    | 14.7771  | 89.0299   | 13.2679  | 6.0513   | 4.3911  |
| 180 | CPN2          | 4.7134 | 0.0002 | 22.6586   | 31.7708  | 38.1557   | 4.1462   | 10.3737  | 5.1229  |
| 181 | PROK1         | 4.6853 | 0.0311 | 5.4693    | 48.7645  | 12.7186   | 3.3170   | 9.5092   | 1.4637  |
| 182 | PLA2G2A       | 4.6270 | 0.0387 | 9.3760    | 3.6943   | 9.5389    | 0.8292   | 2.5934   | 1.4637  |
| 183 | AQP3          | 4.6210 | 0.0136 | 14.8453   | 16.2548  | 15.8982   | 1.6585   | 7.7802   | 0.7318  |
| 184 | ORM2          | 4.6194 | 0.0159 | 14.8453   | 13.2994  | 12.7186   | 0.0000   | 5.1868   | 3.6592  |
| 185 | RP11-469M7.1  | 4.6035 | 0.0147 | 27.3466   | 48.7645  | 162.1616  | 5.8047   | 37.1723  | 8.7822  |
| 186 | CTC-246B18.10 | 4.5951 | 0.0449 | 7.0320    | 4.4331   | 22.2575   | 4.1462   | 1.7289   | 1.4637  |
| 187 | TRIM67        | 4.5886 | 0.0003 | 25.0026   | 19.9491  | 19.0778   | 4.9755   | 6.0513   | 2.9274  |
| 188 | BHMT2         | 4.4641 | 0.0011 | 91.4159   | 118.2171 | 168.5209  | 8.2924   | 54.4617  | 21.9554 |
| 189 | C11orf96      | 4.4630 | 0.0000 | 1148.5588 | 480.9957 | 788.5507  | 162.5316 | 282.6820 | 96.6038 |
| 190 | AC010980.2    | 4.4604 | 0.0149 | 16.4080   | 9.6051   | 3.1796    | 2.4877   | 2.5934   | 1.4637  |
| 191 | LGI4          | 4.4577 | 0.0339 | 34.3786   | 75.3634  | 0.0000    | 9.1217   | 10.3737  | 5.1229  |
| 192 | AC017104.6    | 4.4563 | 0.0245 | 14.0640   | 10.3440  | 89.0299   | 6.6339   | 12.9671  | 5.8548  |
| 193 | TRIM54        | 4.4462 | 0.0133 | 32.8160   | 27.3377  | 6.3593    | 1.6585   | 10.3737  | 2.9274  |
| 194 | RBP4          | 4.4156 | 0.0001 | 82.0399   | 70.9302  | 31.7964   | 9.1217   | 22.4762  | 10.2459 |
| 195 | AP001048.4    | 4.3924 | 0.0315 | 11.7200   | 30.2931  | 22.2575   | 0.0000   | 9.5092   | 5.1229  |
| 196 | DMGDH         | 4.3842 | 0.0001 | 64.0693   | 67.2360  | 104.9281  | 9.1217   | 29.3920  | 15.3688 |
| 197 | LINC00672     | 4.3802 | 0.0415 | 3.9067    | 16.9937  | 9.5389    | 0.8292   | 1.7289   | 4.3911  |
| 198 | HIST1H2BC     | 4.3571 | 0.0138 | 8.5947    | 12.5606  | 6.3593    | 1.6585   | 1.7289   | 2.9274  |
| 199 | LINC00313     | 4.3372 | 0.0113 | 40.6293   | 69.4525  | 41.3353   | 1.6585   | 25.9341  | 7.3185  |
| 200 | AC115618.1    | 4.3242 | 0.0460 | 28.1280   | 11.0829  | 0.0000    | 4.1462   | 3.4579   | 1.4637  |
| 201 | TMEM86B       | 4.3138 | 0.0136 | 23.4400   | 9.6051   | 76.3114   | 9.1217   | 10.3737  | 5.8548  |
| 202 | HS6ST2        | 4.3045 | 0.0206 | 5.4693    | 22.1657  | 12.7186   | 1.6585   | 2.5934   | 5.1229  |
| 203 | GZMA          | 4.3026 | 0.0470 | 19.5333   | 22.1657  | 162.1616  | 2.4877   | 30.2565  | 14.6369 |
| 204 | ETNPPL        | 4.2988 | 0.0438 | 7.0320    | 36.2040  | 6.3593    | 0.8292   | 7.7802   | 2.9274  |
| 205 | RP11-141015.1 | 4.2951 | 0.0188 | 15.6267   | 9.6051   | 50.8742   | 2.4877   | 8.6447   | 6.5866  |

## Transcriptome of primary aldosteronism adrenal glands

|     |               |        |        |           |          |           |           |          |          |
|-----|---------------|--------|--------|-----------|----------|-----------|-----------|----------|----------|
| 206 | GPR153        | 4.2610 | 0.0078 | 22.6586   | 18.4714  | 3.1796    | 4.1462    | 2.5934   | 3.6592   |
| 207 | CXCL2         | 4.2505 | 0.0026 | 30.4720   | 35.4651  | 95.3892   | 8.2924    | 21.6118  | 8.0503   |
| 208 | HSPA6         | 4.2134 | 0.0354 | 49.2239   | 72.4080  | 419.7125  | 14.0971   | 96.8208  | 17.5643  |
| 209 | AC116366.6    | 4.2045 | 0.0151 | 21.8773   | 18.4714  | 133.5449  | 17.4141   | 12.9671  | 10.9777  |
| 210 | CYB5A         | 4.1921 | 0.0005 | 421.1382  | 546.0151 | 104.9281  | 87.0705   | 107.1944 | 61.4752  |
| 211 | FOSB          | 4.1914 | 0.0329 | 508.6475  | 672.3596 | 2740.8498 | 53.0715   | 753.8188 | 128.8051 |
| 212 | IGHM          | 4.1897 | 0.0071 | 40.6293   | 44.3314  | 9.5389    | 9.1217    | 11.2381  | 2.1955   |
| 213 | RASGRF1       | 4.1893 | 0.0424 | 10.9387   | 15.5160  | 0.0000    | 1.6585    | 1.7289   | 2.9274   |
| 214 | PRF1          | 4.1853 | 0.0125 | 14.0640   | 8.8663   | 22.2575   | 4.1462    | 5.1868   | 1.4637   |
| 215 | GSTA2         | 4.1848 | 0.0450 | 9.3760    | 8.1274   | 15.8982   | 0.0000    | 4.3224   | 3.6592   |
| 216 | PYY2          | 4.1731 | 0.0004 | 378.1649  | 76.8411  | 270.2694  | 63.8517   | 63.1064  | 46.8382  |
| 217 | CDHR1         | 4.1714 | 0.0192 | 12.5013   | 38.4205  | 15.8982   | 3.3170    | 11.2381  | 1.4637   |
| 218 | SOCS3         | 4.1627 | 0.0239 | 90.6346   | 430.7535 | 724.9579  | 24.8773   | 224.7625 | 49.7656  |
| 219 | SPEG          | 4.1546 | 0.0136 | 79.6959   | 121.9114 | 6.3593    | 22.3896   | 18.1539  | 9.5140   |
| 220 | EFS           | 4.1468 | 0.0429 | 31.2533   | 46.5480  | 0.0000    | 10.7802   | 4.3224   | 3.6592   |
| 221 | RP3-508I15.21 | 4.1423 | 0.0274 | 15.6267   | 9.6051   | 57.2335   | 4.1462    | 12.1026  | 3.6592   |
| 222 | MLXIPL        | 4.1356 | 0.0007 | 2340.8722 | 592.5631 | 1592.9997 | 254.5775  | 613.7744 | 226.1408 |
| 223 | WISP2         | 4.1349 | 0.0021 | 305.5010  | 177.3256 | 47.6946   | 35.6574   | 64.8353  | 27.8102  |
| 224 | RGS9          | 4.1300 | 0.0280 | 25.7840   | 21.4268  | 0.0000    | 3.3170    | 5.1868   | 2.9274   |
| 225 | RPH3AL        | 4.1006 | 0.0001 | 111.7306  | 67.9748  | 200.3173  | 29.0235   | 38.0367  | 25.6147  |
| 226 | MLPH          | 4.0858 | 0.0472 | 10.9387   | 4.4331   | 34.9760   | 5.8047    | 4.3224   | 2.1955   |
| 227 | RP4-740C4.6   | 4.0638 | 0.0306 | 10.1573   | 6.6497   | 31.7964   | 4.9755    | 2.5934   | 4.3911   |
| 228 | OSM           | 4.0448 | 0.0452 | 10.1573   | 3.6943   | 19.0778   | 2.4877    | 3.4579   | 2.1955   |
| 229 | NAPRT1        | 4.0283 | 0.0201 | 84.3839   | 62.0640  | 337.0419  | 19.0726   | 85.5826  | 15.3688  |
| 230 | SLC1A2        | 4.0281 | 0.0149 | 59.3813   | 303.6701 | 384.7365  | 18.2433   | 122.7549 | 44.6427  |
| 231 | HLA-J         | 4.0049 | 0.0452 | 23.4400   | 4.4331   | 19.0778   | 5.8047    | 5.1868   | 0.7318   |
| 232 | SMIM1         | 3.9994 | 0.0452 | 6.2507    | 7.3886   | 31.7964   | 4.9755    | 3.4579   | 2.9274   |
| 233 | IER2          | 3.9975 | 0.0116 | 489.1142  | 449.9637 | 3138.3048 | 237.9926  | 555.8549 | 226.1408 |
| 234 | CTD-2328D6.1  | 3.9892 | 0.0277 | 1551.7264 | 591.8242 | 8998.3815 | 1513.3678 | 885.2184 | 394.4657 |
| 235 | RP11-566J3.4  | 3.9708 | 0.0277 | 10.9387   | 42.1148  | 158.9820  | 15.7556   | 25.9341  | 11.7096  |
| 236 | SCARA5        | 3.9614 | 0.0192 | 56.2559   | 20.6880  | 12.7186   | 4.1462    | 15.5605  | 2.9274   |
| 237 | RDH12         | 3.9604 | 0.0071 | 10.1573   | 29.5543  | 25.4371   | 4.1462    | 8.6447   | 3.6592   |
| 238 | GS1-393G12.12 | 3.9550 | 0.0029 | 35.1600   | 13.2994  | 19.0778   | 6.6339    | 6.0513   | 4.3911   |
| 239 | LCN12         | 3.9544 | 0.0120 | 171.1118  | 20.6880  | 66.7724   | 35.6574   | 17.2894  | 12.4414  |
| 240 | SYT12         | 3.9397 | 0.0392 | 62.5066   | 76.8411  | 38.1557   | 0.8292    | 35.4433  | 8.7822   |
| 241 | APOB          | 3.9370 | 0.0151 | 21.8773   | 7.3886   | 34.9760   | 4.1462    | 7.7802   | 4.3911   |
| 242 | C8G           | 3.9353 | 0.0006 | 46.0986   | 25.1211  | 22.2575   | 9.1217    | 9.5092   | 5.1229   |
| 243 | WNT9A         | 3.9174 | 0.0473 | 39.0666   | 14.0383  | 0.0000    | 4.9755    | 3.4579   | 5.1229   |
| 244 | CPA2          | 3.9121 | 0.0190 | 10.9387   | 8.1274   | 9.5389    | 1.6585    | 3.4579   | 2.1955   |
| 245 | MAP1LC3A      | 3.9043 | 0.0047 | 151.5785  | 126.3445 | 718.5987  | 89.5582   | 102.0076 | 63.6707  |
| 246 | LINC01018     | 3.9001 | 0.0213 | 7.0320    | 22.1657  | 9.5389    | 4.1462    | 4.3224   | 1.4637   |
| 247 | PDLIM4        | 3.8896 | 0.0009 | 17.9706   | 29.5543  | 22.2575   | 6.6339    | 6.9158   | 4.3911   |
| 248 | TRIB1         | 3.8781 | 0.0114 | 93.7599   | 255.6444 | 632.7484  | 40.6329   | 159.9271 | 52.6930  |
| 249 | CPA3          | 3.8756 | 0.0482 | 18.7520   | 5.1720   | 6.3593    | 0.8292    | 2.5934   | 4.3911   |
| 250 | MT1E          | 3.8732 | 0.0070 | 467.2368  | 497.2506 | 2193.9517 | 213.1154  | 467.6788 | 134.6599 |
| 251 | CCDC89        | 3.8619 | 0.0156 | 12.5013   | 14.7771  | 19.0778   | 0.8292    | 6.0513   | 5.1229   |
| 252 | HHIPL1        | 3.8487 | 0.0238 | 7.0320    | 11.8217  | 12.7186   | 4.1462    | 2.5934   | 1.4637   |
| 253 | MIRLET7D      | 3.8468 | 0.0384 | 10.9387   | 5.9109   | 19.0778   | 2.4877    | 1.7289   | 5.1229   |
| 254 | FAM19A5       | 3.8322 | 0.0212 | 6.2507    | 22.1657  | 15.8982   | 3.3170    | 6.0513   | 2.1955   |
| 255 | CBS           | 3.8283 | 0.0092 | 59.3813   | 49.5034  | 12.7186   | 9.9509    | 18.1539  | 3.6592   |
| 256 | CD52          | 3.7932 | 0.0351 | 7.8133    | 10.3440  | 28.6168   | 2.4877    | 6.9158   | 2.9274   |
| 257 | RGS4          | 3.7906 | 0.0000 | 136.7332  | 181.7587 | 82.6706   | 37.3159   | 26.7986  | 41.7153  |

## Transcriptome of primary aldosteronism adrenal glands

|     |               |        |        |           |           |           |          |           |          |
|-----|---------------|--------|--------|-----------|-----------|-----------|----------|-----------|----------|
| 258 | ST6GALNAC2    | 3.7887 | 0.0436 | 25.0026   | 31.7708   | 3.1796    | 1.6585   | 11.2381   | 2.9274   |
| 259 | WDR86         | 3.7476 | 0.0034 | 55.4746   | 16.9937   | 28.6168   | 11.6094  | 9.5092    | 5.8548   |
| 260 | NMB           | 3.7221 | 0.0089 | 28.1280   | 51.7200   | 127.1856  | 16.5849  | 30.2565   | 8.7822   |
| 261 | MT1M          | 3.7013 | 0.0130 | 50.7866   | 22.1657   | 69.9521   | 11.6094  | 23.3407   | 3.6592   |
| 262 | CD6           | 3.6951 | 0.0115 | 20.3146   | 12.5606   | 19.0778   | 2.4877   | 8.6447    | 2.9274   |
| 263 | CNTFR         | 3.6943 | 0.0066 | 53.1306   | 50.2423   | 9.5389    | 11.6094  | 13.8315   | 5.1229   |
| 264 | COL9A3        | 3.6808 | 0.0202 | 26.5653   | 33.9874   | 3.1796    | 4.1462   | 9.5092    | 3.6592   |
| 265 | AGT           | 3.6696 | 0.0341 | 39.8480   | 124.1279  | 95.3892   | 4.9755   | 56.1906   | 9.5140   |
| 266 | PCOLCE2       | 3.6563 | 0.0027 | 39.0666   | 27.3377   | 9.5389    | 5.8047   | 6.9158    | 8.0503   |
| 267 | FABP5P7       | 3.6411 | 0.0113 | 35.1600   | 39.8983   | 6.3593    | 7.4632   | 11.2381   | 3.6592   |
| 268 | TMEM150B      | 3.6341 | 0.0276 | 15.6267   | 6.6497    | 15.8982   | 1.6585   | 5.1868    | 3.6592   |
| 269 | NINJ2         | 3.6213 | 0.0455 | 7.0320    | 6.6497    | 9.5389    | 2.4877   | 1.7289    | 2.1955   |
| 270 | GRID1         | 3.5966 | 0.0064 | 50.7866   | 25.1211   | 31.7964   | 5.8047   | 19.0184   | 5.1229   |
| 271 | RP11-218E20.3 | 3.5881 | 0.0480 | 25.7840   | 6.6497    | 41.3353   | 10.7802  | 1.7289    | 8.0503   |
| 272 | CTD-3193013.9 | 3.5855 | 0.0106 | 11.7200   | 12.5606   | 19.0778   | 4.9755   | 3.4579    | 3.6592   |
| 273 | FAM86FP       | 3.5631 | 0.0499 | 7.0320    | 6.6497    | 12.7186   | 2.4877   | 3.4579    | 1.4637   |
| 274 | KIF26A        | 3.5608 | 0.0318 | 29.6906   | 77.5800   | 6.3593    | 4.9755   | 18.1539   | 8.7822   |
| 275 | PTGS2         | 3.5412 | 0.0045 | 139.8585  | 87.1851   | 44.5150   | 12.4386  | 46.6814   | 17.5643  |
| 276 | PRPS2         | 3.5318 | 0.0472 | 602.4074  | 793.5321  | 117.6467  | 26.5358  | 325.9056  | 76.1121  |
| 277 | SPHK1         | 3.5272 | 0.0170 | 19.5333   | 9.6051    | 34.9760   | 5.8047   | 4.3224    | 8.0503   |
| 278 | RP11-439C15.4 | 3.5166 | 0.0442 | 29.6906   | 3.6943    | 34.9760   | 5.8047   | 7.7802    | 5.8548   |
| 279 | SNORD14E      | 3.4920 | 0.0456 | 11.7200   | 7.3886    | 34.9760   | 3.3170   | 7.7802    | 4.3911   |
| 280 | MT2A          | 3.4917 | 0.0090 | 2619.0266 | 2014.8622 | 7949.1003 | 747.1476 | 2252.8116 | 603.7740 |
| 281 | TTR           | 3.4851 | 0.0331 | 15.6267   | 6.6497    | 31.7964   | 5.8047   | 6.0513    | 3.6592   |
| 282 | SELE          | 3.4595 | 0.0474 | 13.2827   | 33.9874   | 44.5150   | 1.6585   | 19.0184   | 5.8548   |
| 283 | CASC15        | 3.4423 | 0.0467 | 37.5040   | 151.4656  | 76.3114   | 4.9755   | 59.6485   | 12.4414  |
| 284 | GRAMD1C       | 3.4288 | 0.0048 | 28.1280   | 34.7263   | 15.8982   | 4.1462   | 12.9671   | 5.8548   |
| 285 | BAI2          | 3.4148 | 0.0140 | 69.5386   | 51.7200   | 6.3593    | 15.7556  | 12.1026   | 9.5140   |
| 286 | JUND          | 3.4018 | 0.0022 | 1442.3398 | 1183.6484 | 3923.6759 | 522.4229 | 996.7351  | 406.1752 |
| 287 | REM1          | 3.3809 | 0.0322 | 17.1893   | 6.6497    | 28.6168   | 5.8047   | 6.0513    | 3.6592   |
| 288 | ZFP36         | 3.3776 | 0.0059 | 1561.8837 | 1285.6106 | 4550.0650 | 492.5701 | 1276.8237 | 420.8122 |
| 289 | FAM211B       | 3.3709 | 0.0098 | 32.8160   | 24.3823   | 92.2096   | 14.9264  | 19.8828   | 9.5140   |
| 290 | SEMA3B        | 3.3687 | 0.0076 | 4871.6083 | 1916.5943 | 963.4310  | 602.0302 | 1262.1277 | 436.9128 |
| 291 | PMEPA1        | 3.3681 | 0.0227 | 75.7893   | 178.8033  | 79.4910   | 13.2679  | 73.4800   | 12.4414  |
| 292 | PDZD4         | 3.3664 | 0.0002 | 49.2239   | 67.2360   | 34.9760   | 16.5849  | 18.1539   | 10.2459  |
| 293 | FGF17         | 3.3433 | 0.0146 | 79.6959   | 22.1657   | 19.0778   | 15.7556  | 13.8315   | 6.5866   |
| 294 | RASD1         | 3.3372 | 0.0168 | 367.2263  | 616.2065  | 260.7305  | 40.6329  | 271.4439  | 60.7433  |
| 295 | CES1          | 3.3240 | 0.0441 | 195.3331  | 73.1468   | 12.7186   | 14.0971  | 49.2748   | 21.2236  |
| 296 | USP2          | 3.3185 | 0.0046 | 170.3305  | 131.5165  | 79.4910   | 17.4141  | 72.6156   | 24.8828  |
| 297 | NME1-NME2     | 3.3151 | 0.0472 | 12.5013   | 8.1274    | 31.7964   | 6.6339   | 2.5934    | 6.5866   |
| 298 | PNMA3         | 3.3080 | 0.0117 | 132.0452  | 23.6434   | 133.5449  | 38.1452  | 20.7473   | 28.5420  |
| 299 | RP11-613M10.6 | 3.3012 | 0.0043 | 28.9093   | 15.5160   | 19.0778   | 7.4632   | 5.1868    | 6.5866   |
| 300 | DUSP8         | 3.2806 | 0.0057 | 65.6319   | 35.4651   | 19.0778   | 19.0726  | 9.5092    | 8.0503   |
| 301 | DMKN          | 3.2795 | 0.0174 | 82.8212   | 36.9428   | 44.5150   | 7.4632   | 34.5788   | 8.0503   |
| 302 | HCST          | 3.2715 | 0.0242 | 28.1280   | 14.7771   | 69.9521   | 8.2924   | 18.1539   | 8.0503   |
| 303 | UNC13D        | 3.2644 | 0.0015 | 112.5119  | 60.5862   | 31.7964   | 20.7311  | 25.9341   | 16.1006  |
| 304 | CTD-2369P2.2  | 3.2595 | 0.0355 | 11.7200   | 14.0383   | 47.6946   | 4.9755   | 9.5092    | 8.0503   |
| 305 | RPL18A        | 3.2584 | 0.0126 | 58.5999   | 37.6817   | 200.3173  | 36.4867  | 31.1210   | 23.4191  |
| 306 | TF            | 3.2573 | 0.0092 | 71.1013   | 28.0766   | 85.8503   | 10.7802  | 32.8499   | 13.1733  |
| 307 | PTPRN2        | 3.2488 | 0.0304 | 62.5066   | 182.4976  | 12.7186   | 20.7311  | 33.7144   | 24.8828  |
| 308 | NRTN          | 3.2395 | 0.0148 | 21.8773   | 16.9937   | 41.3353   | 5.8047   | 13.8315   | 5.1229   |
| 309 | PLIN5         | 3.2307 | 0.0192 | 68.7573   | 29.5543   | 44.5150   | 6.6339   | 30.2565   | 7.3185   |

## Transcriptome of primary aldosteronism adrenal glands

|     |               |        |        |           |          |           |           |          |          |
|-----|---------------|--------|--------|-----------|----------|-----------|-----------|----------|----------|
| 310 | NEGR1         | 3.2136 | 0.0148 | 33.5973   | 143.3382 | 50.8742   | 15.7556   | 39.7657  | 15.3688  |
| 311 | RP5-1085F17.3 | 3.1963 | 0.0307 | 37.5040   | 34.7263  | 143.0838  | 15.7556   | 40.6301  | 10.9777  |
| 312 | SMOC1         | 3.1862 | 0.0002 | 73.4453   | 99.0068  | 54.0539   | 31.5112   | 14.6960  | 24.8828  |
| 313 | DAPL1         | 3.1859 | 0.0082 | 288.3117  | 227.5679 | 114.4670  | 26.5358   | 124.4838 | 46.8382  |
| 314 | TIMP4         | 3.1772 | 0.0038 | 35.9413   | 48.0257  | 31.7964   | 4.9755    | 19.0184  | 12.4414  |
| 315 | LIMS2         | 3.1753 | 0.0049 | 228.1491  | 77.5800  | 356.1197  | 93.7044   | 65.6998  | 49.0338  |
| 316 | BC02          | 3.1599 | 0.0099 | 298.4690  | 198.0136 | 60.4132   | 31.5112   | 94.2273  | 50.4975  |
| 317 | CD36          | 3.1593 | 0.0233 | 122.6692  | 257.8610 | 25.4371   | 26.5358   | 58.7840  | 43.1790  |
| 318 | RP5-882C2.2   | 3.1358 | 0.0313 | 34.3786   | 14.7771  | 104.9281  | 19.0726   | 14.6960  | 15.3688  |
| 319 | TMEM91        | 3.1327 | 0.0155 | 60.9439   | 27.3377  | 143.0838  | 27.3650   | 31.1210  | 15.3688  |
| 320 | ATP4A         | 3.1111 | 0.0021 | 371.1329  | 209.8353 | 750.3951  | 124.3864  | 194.5060 | 109.0452 |
| 321 | SIDT1         | 3.1091 | 0.0445 | 10.1573   | 26.5988  | 12.7186   | 5.8047    | 8.6447   | 1.4637   |
| 322 | TMEM217       | 3.1057 | 0.0136 | 54.6933   | 58.3697  | 63.5928   | 5.8047    | 37.1723  | 13.9051  |
| 323 | SELENBP1      | 3.1056 | 0.0025 | 298.4690  | 116.7394 | 92.2096   | 48.9253   | 73.4800  | 40.9834  |
| 324 | ADCY1         | 3.1041 | 0.0019 | 55.4746   | 73.1468  | 31.7964   | 12.4386   | 26.7986  | 12.4414  |
| 325 | SCNN1A        | 3.0998 | 0.0420 | 193.7705  | 149.2491 | 25.4371   | 18.2433   | 78.6669  | 21.9554  |
| 326 | C11orf86      | 3.0938 | 0.0443 | 20.3146   | 39.1594  | 9.5389    | 2.4877    | 14.6960  | 5.1229   |
| 327 | RND2          | 3.0935 | 0.0349 | 20.3146   | 56.8920  | 15.8982   | 11.6094   | 15.5605  | 2.9274   |
| 328 | IL1R2         | 3.0781 | 0.0056 | 40.6293   | 50.9811  | 22.2575   | 7.4632    | 20.7473  | 8.7822   |
| 329 | RPS6KL1       | 3.0774 | 0.0082 | 50.7866   | 42.1148  | 9.5389    | 13.2679   | 11.2381  | 8.7822   |
| 330 | SERPINE1      | 3.0674 | 0.0026 | 192.2078  | 134.4719 | 63.5928   | 26.5358   | 64.8353  | 35.8605  |
| 331 | ECE2          | 3.0644 | 0.0109 | 35.1600   | 93.0959  | 19.0778   | 15.7556   | 19.8828  | 12.4414  |
| 332 | HSPB1         | 3.0614 | 0.0188 | 1964.2700 | 685.6590 | 5224.1487 | 1107.8682 | 933.6287 | 530.5892 |
| 333 | GDPD3         | 3.0595 | 0.0265 | 47.6613   | 13.2994  | 69.9521   | 16.5849   | 18.1539  | 8.0503   |
| 334 | ABTB2         | 3.0548 | 0.0001 | 404.7302  | 477.3014 | 286.1676  | 106.1431  | 188.4547 | 87.8217  |
| 335 | C14orf182     | 3.0339 | 0.0303 | 87.5092   | 237.1730 | 92.2096   | 21.5603   | 96.8208  | 19.0280  |
| 336 | LGI2          | 3.0305 | 0.0409 | 14.8453   | 11.0829  | 3.1796    | 2.4877    | 3.4579   | 3.6592   |
| 337 | ACRC          | 3.0136 | 0.0086 | 78.9146   | 78.3188  | 193.9580  | 21.5603   | 65.6998  | 29.2739  |
| 338 | CELSR1        | 2.9949 | 0.0160 | 21.8773   | 15.5160  | 38.1557   | 5.8047    | 12.1026  | 7.3185   |
| 339 | ISG20         | 2.9919 | 0.0108 | 32.8160   | 33.2486  | 95.3892   | 16.5849   | 24.2052  | 13.1733  |
| 340 | TMEM81        | 2.9807 | 0.0483 | 20.3146   | 19.2103  | 66.7724   | 7.4632    | 21.6118  | 6.5866   |
| 341 | TCAP          | 2.9783 | 0.0087 | 21.8773   | 17.7326  | 19.0778   | 5.8047    | 9.5092   | 4.3911   |
| 342 | RAB20         | 2.9777 | 0.0013 | 1068.0816 | 768.4110 | 410.1736  | 189.8966  | 383.8251 | 180.7663 |
| 343 | CH25H         | 2.9750 | 0.0433 | 27.3466   | 23.6434  | 89.0299   | 8.2924    | 28.5275  | 10.2459  |
| 344 | NUDT10        | 2.9732 | 0.0470 | 7.8133    | 19.2103  | 6.3593    | 4.9755    | 2.5934   | 3.6592   |
| 345 | PLCG2         | 2.9571 | 0.0021 | 63.2879   | 143.3382 | 92.2096   | 27.3650   | 51.0038  | 22.6873  |
| 346 | CAMK2N2       | 2.9486 | 0.0085 | 33.5973   | 36.9428  | 22.2575   | 7.4632    | 18.1539  | 5.8548   |
| 347 | CPLX1         | 2.9474 | 0.0090 | 63.2879   | 45.0703  | 127.1856  | 36.4867   | 30.2565  | 13.1733  |
| 348 | ECEL1         | 2.9408 | 0.0122 | 23.4400   | 33.9874  | 44.5150   | 7.4632    | 19.8828  | 7.3185   |
| 349 | FIGF          | 2.9318 | 0.0446 | 32.8160   | 23.6434  | 19.0778   | 2.4877    | 18.1539  | 5.1229   |
| 350 | NFATC1        | 2.9184 | 0.0346 | 41.4106   | 31.7708  | 73.1317   | 4.9755    | 31.9854  | 13.1733  |
| 351 | WDR66         | 2.9183 | 0.0228 | 26.5653   | 25.1211  | 73.1317   | 10.7802   | 22.4762  | 9.5140   |
| 352 | CHRNA2        | 2.9147 | 0.0139 | 32.0346   | 25.8600  | 12.7186   | 7.4632    | 4.3224   | 12.4414  |
| 353 | ZNF541        | 2.9128 | 0.0018 | 78.9146   | 34.7263  | 44.5150   | 16.5849   | 21.6118  | 16.1006  |
| 354 | PDZK1IP1      | 2.9049 | 0.0157 | 31.2533   | 13.2994  | 38.1557   | 10.7802   | 10.3737  | 7.3185   |
| 355 | PDE6A         | 2.9018 | 0.0384 | 28.1280   | 29.5543  | 3.1796    | 4.1462    | 9.5092   | 7.3185   |
| 356 | DTX1          | 2.9014 | 0.0056 | 56.2559   | 49.5034  | 146.2634  | 26.5358   | 35.4433  | 24.8828  |
| 357 | RP11-77403.3  | 2.9003 | 0.0464 | 19.5333   | 19.2103  | 50.8742   | 9.9509    | 17.2894  | 3.6592   |
| 358 | AC093642.3    | 2.8893 | 0.0305 | 12.5013   | 15.5160  | 6.3593    | 3.3170    | 3.4579   | 5.1229   |
| 359 | COR07         | 2.8856 | 0.0340 | 58.5999   | 19.9491  | 143.0838  | 31.5112   | 23.3407  | 21.9554  |
| 360 | KRT19         | 2.8804 | 0.0269 | 16.4080   | 48.0257  | 60.4132   | 22.3896   | 7.7802   | 13.1733  |
| 361 | SPATC1L       | 2.8772 | 0.0042 | 178.1438  | 84.9685  | 311.6047  | 71.3149   | 78.6669  | 49.7656  |

## Transcriptome of primary aldosteronism adrenal glands

|     |                 |        |        |           |          |           |          |          |          |
|-----|-----------------|--------|--------|-----------|----------|-----------|----------|----------|----------|
| 362 | TUBB2A          | 2.8764 | 0.0202 | 20.3146   | 42.8537  | 12.7186   | 8.2924   | 12.9671  | 5.1229   |
| 363 | WASH3P          | 2.8756 | 0.0275 | 296.9064  | 115.2616 | 903.0178  | 184.9211 | 153.8758 | 118.5593 |
| 364 | FGG             | 2.8739 | 0.0148 | 30.4720   | 50.9811  | 12.7186   | 8.2924   | 16.4249  | 8.0503   |
| 365 | TMOD1           | 2.8719 | 0.0049 | 208.6158  | 360.5621 | 111.2874  | 52.2423  | 121.0259 | 63.6707  |
| 366 | MESP1           | 2.8673 | 0.0199 | 47.6613   | 18.4714  | 82.6706   | 19.9018  | 12.9671  | 19.0280  |
| 367 | ADAMTS9         | 2.8575 | 0.0172 | 39.0666   | 64.2805  | 187.5988  | 31.5112  | 33.7144  | 36.5924  |
| 368 | SERTAD1         | 2.8567 | 0.0407 | 58.5999   | 68.7137  | 273.4490  | 29.0235  | 81.2603  | 30.0057  |
| 369 | BEX1            | 2.8460 | 0.0034 | 75.0079   | 254.1667 | 158.9820  | 68.8271  | 58.7840  | 43.9108  |
| 370 | CD248           | 2.8424 | 0.0136 | 64.0693   | 22.9046  | 19.0778   | 14.0971  | 12.9671  | 10.2459  |
| 371 | TECRP1          | 2.8423 | 0.0236 | 213.3038  | 110.0896 | 705.8801  | 128.5326 | 139.1798 | 94.4083  |
| 372 | NGEF            | 2.8415 | 0.0003 | 832.9005  | 390.1163 | 457.8682  | 214.7738 | 237.7295 | 139.0510 |
| 373 | EFHD1           | 2.8327 | 0.0006 | 40.6293   | 33.9874  | 41.3353   | 14.9264  | 12.1026  | 13.9051  |
| 374 | PTK7            | 2.8204 | 0.0037 | 35.1600   | 35.4651  | 31.7964   | 12.4386  | 17.2894  | 6.5866   |
| 375 | SLC8A1          | 2.8194 | 0.0455 | 89.8532   | 106.3954 | 12.7186   | 14.9264  | 42.3591  | 16.8325  |
| 376 | PIGA            | 2.8170 | 0.0185 | 57.8186   | 189.1473 | 57.2335   | 22.3896  | 57.0551  | 28.5420  |
| 377 | STARD10         | 2.8050 | 0.0088 | 1406.3985 | 721.1241 | 3421.2928 | 801.8776 | 612.0455 | 564.2542 |
| 378 | HP              | 2.8030 | 0.0405 | 125.7945  | 37.6817  | 241.6526  | 23.2188  | 75.2090  | 46.1064  |
| 379 | TUBB3           | 2.7983 | 0.0076 | 32.0346   | 118.9559 | 79.4910   | 30.6820  | 26.7986  | 24.8828  |
| 380 | RPS28           | 2.7969 | 0.0241 | 57.8186   | 42.8537  | 162.1616  | 26.5358  | 48.4104  | 19.0280  |
| 381 | XXyac-YRM2039.2 | 2.7953 | 0.0480 | 110.9492  | 51.7200  | 419.7125  | 77.1196  | 87.3116  | 43.9108  |
| 382 | ID4             | 2.7896 | 0.0024 | 46.0986   | 29.5543  | 41.3353   | 13.2679  | 10.3737  | 18.2962  |
| 383 | GPD1            | 2.7877 | 0.0152 | 60.1626   | 47.2868  | 9.5389    | 14.0971  | 14.6960  | 13.1733  |
| 384 | MN1             | 2.7780 | 0.0176 | 45.3173   | 31.7708  | 15.8982   | 5.8047   | 18.1539  | 9.5140   |
| 385 | MT1F            | 2.7727 | 0.0035 | 254.7144  | 256.3833 | 248.0119  | 87.8997  | 147.8245 | 38.0561  |
| 386 | HLX             | 2.7715 | 0.0481 | 38.2853   | 9.6051   | 47.6946   | 11.6094  | 15.5605  | 7.3185   |
| 387 | PSD             | 2.7661 | 0.0148 | 24.2213   | 68.7137  | 28.6168   | 20.7311  | 12.9671  | 10.2459  |
| 388 | SOX18           | 2.7556 | 0.0027 | 80.4772   | 51.7200  | 73.1317   | 16.5849  | 38.9012  | 19.0280  |
| 389 | CCL2            | 2.7498 | 0.0296 | 316.4397  | 232.0010 | 63.5928   | 47.2668  | 131.3996 | 43.9108  |
| 390 | TMEM205         | 2.7449 | 0.0141 | 225.0238  | 144.8159 | 651.8262  | 138.4835 | 140.0443 | 93.6764  |
| 391 | KIT             | 2.7371 | 0.0216 | 14.0640   | 32.5097  | 12.7186   | 8.2924   | 6.0513   | 7.3185   |
| 392 | SMPD3           | 2.7209 | 0.0012 | 48.4426   | 42.8537  | 50.8742   | 24.0480  | 12.1026  | 16.1006  |
| 393 | C10orf10        | 2.7209 | 0.0003 | 394.5729  | 251.2113 | 406.9939  | 100.3384 | 184.1323 | 102.4586 |
| 394 | ADAMTS4         | 2.7141 | 0.0145 | 42.1920   | 20.6880  | 31.7964   | 14.9264  | 6.0513   | 13.9051  |
| 395 | CSPG4           | 2.7103 | 0.0073 | 38.2853   | 35.4651  | 22.2575   | 9.9509   | 18.1539  | 7.3185   |
| 396 | NKG7            | 2.7038 | 0.0467 | 18.7520   | 16.9937  | 50.8742   | 8.2924   | 16.4249  | 7.3185   |
| 397 | LOXL4           | 2.7031 | 0.0046 | 39.8480   | 33.2486  | 38.1557   | 17.4141  | 16.4249  | 7.3185   |
| 398 | FAM195A         | 2.7016 | 0.0163 | 766.4872  | 311.7975 | 1542.1255 | 410.4751 | 355.2976 | 204.1854 |
| 399 | VASN            | 2.6995 | 0.0193 | 160.1732  | 116.0005 | 38.1557   | 31.5112  | 62.2419  | 22.6873  |
| 400 | BHLHE40         | 2.6987 | 0.0286 | 344.5676  | 581.4802 | 1888.7062 | 274.4793 | 510.9024 | 257.6102 |
| 401 | FSTL3           | 2.6894 | 0.0010 | 1127.4628 | 738.8567 | 629.5687  | 271.1623 | 460.7631 | 196.1351 |
| 402 | SEMA5A          | 2.6886 | 0.0245 | 14.8453   | 44.3314  | 47.6946   | 9.9509   | 12.9671  | 16.8325  |
| 403 | METRNL          | 2.6874 | 0.0038 | 78.9146   | 39.8983  | 82.6706   | 19.9018  | 34.5788  | 20.4917  |
| 404 | ATF3            | 2.6816 | 0.0435 | 291.4370  | 414.4986 | 200.3173  | 45.6083  | 245.5098 | 46.8382  |
| 405 | GNG2            | 2.6808 | 0.0490 | 30.4720   | 95.3125  | 15.8982   | 9.9509   | 26.7986  | 16.1006  |
| 406 | GPIHBP1         | 2.6705 | 0.0316 | 52.3493   | 21.4268  | 104.9281  | 24.8773  | 16.4249  | 25.6147  |
| 407 | TSSC4           | 2.6671 | 0.0300 | 158.6105  | 96.7902  | 527.8203  | 124.3864 | 96.8208  | 72.4529  |
| 408 | KCNIP2          | 2.6664 | 0.0236 | 63.2879   | 25.8600  | 25.4371   | 23.2188  | 9.5092   | 10.2459  |
| 409 | WDR25           | 2.6642 | 0.0295 | 70.3199   | 44.3314  | 209.8562  | 43.1206  | 50.1393  | 28.5420  |
| 410 | PGF             | 2.6637 | 0.0175 | 60.1626   | 38.4205  | 19.0778   | 9.1217   | 23.3407  | 11.7096  |
| 411 | AP000783.1      | 2.6625 | 0.0006 | 717.2633  | 386.4221 | 972.9699  | 302.6736 | 267.9860 | 209.3083 |
| 412 | ABCC6P1         | 2.6524 | 0.0444 | 20.3146   | 11.8217  | 22.2575   | 4.1462   | 11.2381  | 5.1229   |
| 413 | MAPK4           | 2.6447 | 0.0282 | 439.1089  | 552.6648 | 139.9042  | 70.4856  | 249.8321 | 107.5815 |



## Transcriptome of primary aldosteronism adrenal glands

|     |              |        |        |            |            |           |           |           |           |
|-----|--------------|--------|--------|------------|------------|-----------|-----------|-----------|-----------|
| 414 | CISH         | 2.6420 | 0.0041 | 47.6613    | 58.3697    | 41.3353   | 9.9509    | 26.7986   | 19.0280   |
| 415 | ALDH3B1      | 2.6419 | 0.0001 | 387.5409   | 232.7399   | 219.3952  | 101.9968  | 123.6194  | 92.2128   |
| 416 | SLC29A1      | 2.6337 | 0.0361 | 1812.6915  | 791.3155   | 225.7544  | 383.1101  | 422.7263  | 268.5879  |
| 417 | KCNIP4       | 2.6312 | 0.0048 | 32.8160    | 33.2486    | 41.3353   | 8.2924    | 16.4249   | 16.1006   |
| 418 | SPRN         | 2.6299 | 0.0486 | 61.7253    | 22.1657    | 152.6227  | 35.6574   | 29.3920   | 24.8828   |
| 419 | LFNG         | 2.6261 | 0.0053 | 62.5066    | 39.1594    | 47.6946   | 21.5603   | 25.0697   | 10.2459   |
| 420 | MIIP         | 2.6245 | 0.0184 | 110.9492   | 53.9365    | 228.9341  | 62.1932   | 52.7327   | 35.1287   |
| 421 | NFIL3        | 2.6231 | 0.0409 | 868.8418   | 1128.9730  | 734.4969  | 108.6308  | 743.4451  | 189.5484  |
| 422 | TMEM160      | 2.6185 | 0.0191 | 70.3199    | 42.8537    | 130.3652  | 41.4621   | 35.4433   | 16.1006   |
| 423 | EGFL7        | 2.6116 | 0.0123 | 343.7863   | 90.8794    | 295.7065  | 125.2156  | 71.7511   | 82.6987   |
| 424 | CCDC151      | 2.6067 | 0.0182 | 57.0373    | 53.1977    | 19.0778   | 15.7556   | 25.0697   | 8.7822    |
| 425 | HCFC1R1      | 2.6021 | 0.0374 | 157.0478   | 107.8731   | 562.7963  | 111.1185  | 137.4509  | 69.5255   |
| 426 | AKR1C2       | 2.5933 | 0.0452 | 36.7226    | 62.0640    | 6.3593    | 11.6094   | 12.1026   | 16.8325   |
| 427 | FLYWCH2      | 2.5903 | 0.0002 | 212.5224   | 200.9690   | 343.4011  | 96.1921   | 118.4325  | 77.5758   |
| 428 | KLF2         | 2.5865 | 0.0145 | 471.1435   | 303.6701   | 143.0838  | 93.7044   | 190.1836  | 70.9892   |
| 429 | PLEKHG2      | 2.5748 | 0.0154 | 88.2906    | 42.8537    | 165.3413  | 44.7791   | 38.9012   | 31.4694   |
| 430 | CRIP1        | 2.5734 | 0.0179 | 85.1652    | 50.9811    | 38.1557   | 14.9264   | 38.9012   | 13.9051   |
| 431 | TMEM52       | 2.5717 | 0.0070 | 187.5198   | 83.4908    | 263.9101  | 80.4365   | 77.8024   | 49.7656   |
| 432 | CYP4F12      | 2.5687 | 0.0169 | 99.2292    | 30.2931    | 50.8742   | 28.1942   | 25.9341   | 16.1006   |
| 433 | CXorf40B     | 2.5637 | 0.0136 | 810.2418   | 206.1410   | 305.2455  | 160.8731  | 212.6599  | 141.9784  |
| 434 | RBP5         | 2.5624 | 0.0009 | 65.6319    | 55.4143    | 57.2335   | 23.2188   | 30.2565   | 16.1006   |
| 435 | CDK2AP2      | 2.5560 | 0.0072 | 709.4499   | 572.6139   | 1659.7721 | 343.3065  | 527.3273  | 280.2975  |
| 436 | ARHGAP24     | 2.5484 | 0.0202 | 25.0026    | 22.9046    | 25.4371   | 6.6339    | 15.5605   | 6.5866    |
| 437 | CTA-445C9.15 | 2.5446 | 0.0112 | 20.3146    | 45.8091    | 31.7964   | 11.6094   | 12.9671   | 13.9051   |
| 438 | PRKAR1B      | 2.5439 | 0.0060 | 53.1306    | 82.0131    | 127.1856  | 39.8036   | 40.6301   | 22.6873   |
| 439 | DAK          | 2.5358 | 0.0439 | 2219.7657  | 1622.5293  | 381.5568  | 370.6715  | 923.2551  | 371.7784  |
| 440 | ALPL         | 2.5353 | 0.0094 | 468.0182   | 986.3737   | 511.9221  | 160.0438  | 429.6421  | 185.8892  |
| 441 | RAB4B        | 2.5296 | 0.0247 | 107.8239   | 39.1594    | 165.3413  | 55.5593   | 37.1723   | 30.7376   |
| 442 | NFKBIA       | 2.5252 | 0.0180 | 1403.2732  | 1838.2755  | 4696.3284 | 779.4881  | 1622.6122 | 741.3612  |
| 443 | EGFLAM       | 2.5240 | 0.0285 | 40.6293    | 123.3891   | 34.9760   | 16.5849   | 33.7144   | 28.5420   |
| 444 | EXOSC4       | 2.5215 | 0.0341 | 108.6052   | 52.4588    | 254.3712  | 72.9734   | 54.4617   | 37.3242   |
| 445 | C9orf142     | 2.5171 | 0.0165 | 255.4957   | 99.7457    | 391.0957  | 126.0449  | 104.6010  | 65.8663   |
| 446 | CHST7        | 2.5099 | 0.0034 | 35.9413    | 41.3760    | 22.2575   | 13.2679   | 14.6960   | 11.7096   |
| 447 | BSPRY        | 2.5061 | 0.0419 | 12.5013    | 22.9046    | 15.8982   | 4.9755    | 10.3737   | 5.1229    |
| 448 | TST          | 2.4972 | 0.0056 | 951.6630   | 644.2830   | 2050.8679 | 490.0824  | 552.3970  | 417.8848  |
| 449 | SNAI1        | 2.4748 | 0.0073 | 56.2559    | 28.8154    | 41.3353   | 14.0971   | 21.6118   | 15.3688   |
| 450 | CEBPB        | 2.4732 | 0.0063 | 1104.8042  | 888.8446   | 1675.6703 | 359.0621  | 809.1449  | 315.4262  |
| 451 | IL32         | 2.4687 | 0.0283 | 45.3173    | 39.8983    | 101.7485  | 20.7311   | 38.9012   | 16.1006   |
| 452 | MRPL55       | 2.4603 | 0.0373 | 336.7543   | 133.7331   | 798.0897  | 199.0182  | 184.1323  | 132.4643  |
| 453 | SARDH        | 2.4550 | 0.0289 | 18.7520    | 15.5160    | 12.7186   | 6.6339    | 5.1868    | 7.3185    |
| 454 | SIGIRR       | 2.4527 | 0.0427 | 53.1306    | 36.2040    | 127.1856  | 30.6820   | 41.4946   | 16.1006   |
| 455 | SLC44A3      | 2.4527 | 0.0033 | 45.3173    | 40.6371    | 25.4371   | 17.4141   | 15.5605   | 12.4414   |
| 456 | CDYL2        | 2.4508 | 0.0266 | 27.3466    | 45.8091    | 85.8503   | 14.9264   | 25.0697   | 24.8828   |
| 457 | OSGIN1       | 2.4508 | 0.0023 | 333.6290   | 178.0645   | 451.5089  | 141.8005  | 144.3667  | 106.8497  |
| 458 | ALAS1        | 2.4483 | 0.0215 | 12181.7554 | 12033.7590 | 7205.0645 | 2133.6413 | 8046.4965 | 2653.6781 |
| 459 | PLEKHA6      | 2.4449 | 0.0421 | 73.4453    | 162.5485   | 25.4371   | 33.1697   | 46.6814   | 27.0783   |
| 460 | PPFIBP2      | 2.4442 | 0.0008 | 93.7599    | 125.6056   | 95.3892   | 33.9989   | 59.6485   | 35.1287   |
| 461 | MAFF         | 2.4344 | 0.0000 | 334.4103   | 254.9056   | 352.9401  | 142.6297  | 147.8245  | 96.6038   |
| 462 | TPBG         | 2.4314 | 0.0350 | 21.8773    | 54.6754    | 19.0778   | 16.5849   | 14.6960   | 8.0503    |
| 463 | RP11-69E11.4 | 2.4312 | 0.0458 | 50.0053    | 19.9491    | 34.9760   | 14.0971   | 22.4762   | 6.5866    |
| 464 | REC8         | 2.4307 | 0.0032 | 60.1626    | 58.3697    | 114.4670  | 33.9989   | 31.1210   | 30.7376   |
| 465 | HTRA3        | 2.4220 | 0.0349 | 43.7546    | 40.6371    | 22.2575   | 10.7802   | 25.9341   | 7.3185    |

## Transcriptome of primary aldosteronism adrenal glands

|     |          |        |        |            |            |            |            |            |           |
|-----|----------|--------|--------|------------|------------|------------|------------|------------|-----------|
| 466 | TUBA4A   | 2.4118 | 0.0075 | 200.0211   | 297.7592   | 473.7664   | 97.0214    | 199.6928   | 106.1178  |
| 467 | H2AFY2   | 2.4035 | 0.0315 | 14.8453    | 21.4268    | 19.0778    | 7.4632     | 6.0513     | 9.5140    |
| 468 | CYB561   | 2.3952 | 0.0160 | 335.1917   | 1074.2976  | 349.7604   | 288.5764   | 225.6269   | 220.2860  |
| 469 | TNFRSF21 | 2.3930 | 0.0053 | 42.1920    | 50.2423    | 38.1557    | 13.2679    | 25.9341    | 15.3688   |
| 470 | CSRNP1   | 2.3881 | 0.0212 | 436.7649   | 727.7738   | 833.0657   | 152.5806   | 503.1222   | 180.7663  |
| 471 | DCXR     | 2.3842 | 0.0308 | 322.6903   | 180.2810   | 836.2453   | 214.7738   | 200.5573   | 146.3694  |
| 472 | PTGDS    | 2.3817 | 0.0096 | 359.4130   | 174.3702   | 190.7784   | 110.2893   | 138.3154   | 55.6204   |
| 473 | SDC4     | 2.3810 | 0.0019 | 723.5139   | 1044.7434  | 1774.2392  | 433.6939   | 574.0088   | 480.0918  |
| 474 | AKR7A3   | 2.3788 | 0.0121 | 37.5040    | 28.8154    | 25.4371    | 14.0971    | 16.4249    | 8.0503    |
| 475 | FUOM     | 2.3726 | 0.0133 | 27.3466    | 31.7708    | 38.1557    | 14.9264    | 17.2894    | 8.7822    |
| 476 | TSPAN4   | 2.3724 | 0.0450 | 387.5409   | 153.6822   | 63.5928    | 90.3874    | 99.4142    | 65.1344   |
| 477 | MACROD1  | 2.3658 | 0.0333 | 132.0452   | 79.7965    | 349.7604   | 92.0459    | 74.3445    | 70.9892   |
| 478 | PALM     | 2.3632 | 0.0252 | 202.3651   | 161.8096   | 54.0539    | 40.6329    | 87.3116    | 49.0338   |
| 479 | ID1      | 2.3620 | 0.0198 | 537.5568   | 199.4913   | 178.0598   | 149.2637   | 154.7403   | 83.4306   |
| 480 | VAMP5    | 2.3561 | 0.0058 | 429.7329   | 217.2239   | 378.3772   | 165.0193   | 186.7257   | 83.4306   |
| 481 | PVRL1    | 2.3550 | 0.0109 | 31.2533    | 56.8920    | 60.4132    | 27.3650    | 18.1539    | 17.5643   |
| 482 | TGFB1I1  | 2.3536 | 0.0045 | 92.1972    | 71.6691    | 47.6946    | 25.7065    | 41.4946    | 22.6873   |
| 483 | WNK3     | 2.3476 | 0.0293 | 109.3866   | 71.6691    | 22.2575    | 23.2188    | 36.3078    | 27.0783   |
| 484 | SDC1     | 2.3468 | 0.0074 | 363.3196   | 206.1410   | 594.5927   | 153.4099   | 205.7441   | 136.8554  |
| 485 | TMEM37   | 2.3465 | 0.0148 | 69.5386    | 35.4651    | 98.5688    | 29.0235    | 32.8499    | 24.8828   |
| 486 | UCP2     | 2.3465 | 0.0476 | 194.5518   | 240.8673   | 50.8742    | 49.7546    | 110.6523   | 46.8382   |
| 487 | HLA-A    | 2.3414 | 0.0320 | 1302.4813  | 1798.3772  | 4451.4962  | 762.9032   | 1698.6856  | 764.0485  |
| 488 | ATP1B3   | 2.3353 | 0.0250 | 1191.5321  | 2137.5124  | 4139.8914  | 687.4421   | 1597.5425  | 913.3453  |
| 489 | DIO2     | 2.3352 | 0.0009 | 95.3226    | 79.0577    | 136.7245   | 38.9744    | 46.6814    | 47.5701   |
| 490 | TRAPP2CL | 2.3268 | 0.0203 | 784.4579   | 668.6653   | 2276.6223  | 551.4464   | 609.4521   | 442.0357  |
| 491 | H2AFJ    | 2.3254 | 0.0260 | 578.1861   | 464.7409   | 1561.2033  | 311.7952   | 525.5984   | 282.4930  |
| 492 | SPTSSA   | 2.3237 | 0.0018 | 1052.4549  | 1390.5283  | 565.9759   | 376.4762   | 462.4920   | 455.9408  |
| 493 | CFP      | 2.3235 | 0.0203 | 31.2533    | 20.6880    | 34.9760    | 14.9264    | 12.9671    | 9.5140    |
| 494 | ALDOB    | 2.3230 | 0.0189 | 40.6293    | 28.0766    | 66.7724    | 17.4141    | 23.3407    | 17.5643   |
| 495 | RUNX1    | 2.3221 | 0.0310 | 50.0053    | 74.6245    | 162.1616   | 28.1942    | 53.5972    | 41.7153   |
| 496 | BOK      | 2.3194 | 0.0460 | 92.9786    | 58.3697    | 25.4371    | 24.8773    | 38.9012    | 12.4414   |
| 497 | APOE     | 2.3102 | 0.0040 | 28070.1522 | 19075.0633 | 39929.9205 | 12853.2609 | 16758.6358 | 8080.3252 |
| 498 | BCL6     | 2.3094 | 0.0094 | 654.7567   | 436.6643   | 1351.3470  | 367.3545   | 378.6383   | 311.7669  |
| 499 | SOX6     | 2.3075 | 0.0364 | 29.6906    | 58.3697    | 63.5928    | 10.7802    | 24.2052    | 30.7376   |
| 500 | TFEB     | 2.3056 | 0.0428 | 82.8212    | 33.2486    | 54.0539    | 27.3650    | 35.4433    | 10.9777   |
| 501 | IRX3     | 2.2975 | 0.0312 | 77.3519    | 27.3377    | 34.9760    | 26.5358    | 18.1539    | 16.1006   |
| 502 | GSDMB    | 2.2801 | 0.0464 | 38.2853    | 28.0766    | 12.7186    | 13.2679    | 15.5605    | 5.8548    |
| 503 | ACSL5    | 2.2784 | 0.0235 | 50.0053    | 52.4588    | 130.3652   | 29.0235    | 38.0367    | 35.1287   |
| 504 | ATP5D    | 2.2777 | 0.0304 | 713.3566   | 375.3392   | 1475.3530  | 438.6694   | 442.6092   | 244.4370  |
| 505 | HOXC6    | 2.2764 | 0.0085 | 41.4106    | 50.2423    | 73.1317    | 30.6820    | 19.0184    | 22.6873   |
| 506 | DCUN1D3  | 2.2724 | 0.0127 | 152.3598   | 121.1725   | 225.7544   | 50.5838    | 114.9746   | 54.1567   |
| 507 | ADCK5    | 2.2711 | 0.0121 | 227.3678   | 108.6119   | 184.4191   | 99.5091    | 86.4471    | 43.1790   |
| 508 | MIR24-2  | 2.2687 | 0.0138 | 90.6346    | 37.6817    | 79.4910    | 35.6574    | 25.9341    | 30.0057   |
| 509 | MIDN     | 2.2658 | 0.0218 | 438.3275   | 599.2128   | 1370.4249  | 291.8934   | 492.7485   | 278.1019  |
| 510 | PER1     | 2.2585 | 0.0061 | 2617.4640  | 1270.0947  | 1033.3830  | 759.5863   | 826.4343   | 592.7963  |
| 511 | PHYHIP   | 2.2510 | 0.0011 | 546.9328   | 540.8431   | 912.5567   | 310.1367   | 355.2976   | 223.2134  |
| 512 | GSTO2    | 2.2449 | 0.0149 | 40.6293    | 37.6817    | 50.8742    | 19.9018    | 25.9341    | 11.7096   |
| 513 | GBP2     | 2.2433 | 0.0086 | 705.5433   | 732.2070   | 362.4790   | 193.2135   | 398.5212   | 210.7720  |
| 514 | SLC25A25 | 2.2393 | 0.0004 | 240.6504   | 384.2055   | 251.1916   | 134.3373   | 147.8245   | 109.0452  |
| 515 | ABLM3    | 2.2389 | 0.0351 | 122.6692   | 87.1851    | 28.6168    | 27.3650    | 48.4104    | 30.7376   |
| 516 | SLC26A1  | 2.2388 | 0.0439 | 153.9225   | 210.5742   | 57.2335    | 44.7791    | 101.1431   | 42.4471   |
| 517 | AKR1C3   | 2.2355 | 0.0019 | 103.1359   | 84.9685    | 60.4132    | 43.1206    | 28.5275    | 39.5198   |

## Transcriptome of primary aldosteronism adrenal glands

|     |               |        |        |            |            |            |           |           |           |
|-----|---------------|--------|--------|------------|------------|------------|-----------|-----------|-----------|
| 518 | GUK1          | 2.2337 | 0.0049 | 1672.0516  | 714.4744   | 1389.5027  | 710.6609  | 542.8878  | 436.9128  |
| 519 | RP11-73M18.8  | 2.2318 | 0.0054 | 71.8826    | 49.5034    | 95.3892    | 30.6820   | 37.1723   | 29.2739   |
| 520 | BABAM1        | 2.2304 | 0.0434 | 113.2932   | 73.1468    | 292.5269   | 84.5827   | 70.8866   | 59.2796   |
| 521 | BIN1          | 2.2278 | 0.0094 | 1700.1796  | 824.5641   | 629.5687   | 527.3983  | 515.2247  | 373.2421  |
| 522 | RP11-568K15.1 | 2.2272 | 0.0033 | 264.8717   | 128.5611   | 155.8024   | 91.2167   | 68.2932   | 87.0898   |
| 523 | SYT11         | 2.2248 | 0.0495 | 53.1306    | 249.7336   | 155.8024   | 66.3394   | 52.7327   | 87.0898   |
| 524 | TEKT4P2       | 2.2128 | 0.0479 | 206.2718   | 53.9365    | 225.7544   | 93.7044   | 62.2419   | 63.6707   |
| 525 | ABHD14B       | 2.2113 | 0.0112 | 623.5034   | 413.7597   | 1208.2632  | 377.3054  | 348.3818  | 289.8115  |
| 526 | LDLR          | 2.2109 | 0.0282 | 3271.4393  | 5436.5076  | 1936.4008  | 1084.6494 | 2568.3435 | 1161.4416 |
| 527 | PLB1          | 2.2070 | 0.0200 | 125.7945   | 108.6119   | 104.9281   | 29.8527   | 87.3116   | 36.5924   |
| 528 | ZNRD1         | 2.2060 | 0.0461 | 75.7893    | 53.1977    | 136.7245   | 24.8773   | 64.8353   | 30.7376   |
| 529 | CASP9         | 2.2018 | 0.0211 | 789.1458   | 795.0098   | 330.6826   | 214.7738  | 447.7960  | 207.1128  |
| 530 | IFI27         | 2.2010 | 0.0279 | 747.7352   | 1307.7763  | 747.2154   | 254.5775  | 739.9872  | 278.8338  |
| 531 | BACE2         | 2.1991 | 0.0395 | 59.3813    | 43.5925    | 85.8503    | 14.0971   | 43.2236   | 28.5420   |
| 532 | MANF          | 2.1975 | 0.0168 | 291.4370   | 334.7021   | 807.6286   | 217.2616  | 255.8834  | 179.3026  |
| 533 | CRIP2         | 2.1873 | 0.0312 | 308.6263   | 201.7079   | 85.8503    | 113.6062  | 101.1431  | 57.8159   |
| 534 | CD14          | 2.1854 | 0.0039 | 636.0047   | 604.3848   | 438.7903   | 231.3587  | 370.8581  | 166.1293  |
| 535 | MT1L          | 2.1791 | 0.0252 | 49.2239    | 36.2040    | 25.4371    | 14.0971   | 25.0697   | 11.7096   |
| 536 | PPP2R1A       | 2.1789 | 0.0029 | 3133.9247  | 2539.4505  | 5583.4480  | 1949.5495 | 1652.0042 | 1564.6894 |
| 537 | PDGFA         | 2.1788 | 0.0473 | 38.2853    | 54.6754    | 47.6946    | 9.9509    | 36.3078   | 18.2962   |
| 538 | COL7A1        | 2.1774 | 0.0270 | 35.9413    | 29.5543    | 22.2575    | 14.0971   | 18.1539   | 8.0503    |
| 539 | TP53I13       | 2.1740 | 0.0151 | 303.1570   | 120.4336   | 295.7065   | 126.8741  | 122.7549  | 81.2350   |
| 540 | CEBPD         | 2.1731 | 0.0043 | 746.1726   | 584.4356   | 655.0059   | 248.7728  | 460.7631  | 204.1854  |
| 541 | CYP11A1       | 2.1721 | 0.0002 | 24435.3933 | 14010.9395 | 18937.9365 | 8882.0179 | 9750.3690 | 7786.1227 |
| 542 | GPX3          | 2.1707 | 0.0026 | 2138.5071  | 1692.7207  | 2308.4187  | 704.0270  | 1387.4760 | 736.9702  |
| 543 | MYL6          | 2.1634 | 0.0188 | 3464.4284  | 2267.5512  | 7109.6753  | 1923.8429 | 2398.9072 | 1612.9913 |
| 544 | PHYHD1        | 2.1615 | 0.0053 | 108.6052   | 59.1085    | 73.1317    | 32.3405   | 43.2236   | 35.8605   |
| 545 | SLC22A15      | 2.1507 | 0.0126 | 59.3813    | 93.8348    | 50.8742    | 20.7311   | 39.7657   | 34.3968   |
| 546 | MAPK11        | 2.1432 | 0.0118 | 72.6639    | 45.0703    | 63.5928    | 37.3159   | 26.7986   | 20.4917   |
| 547 | GFPT2         | 2.1415 | 0.0231 | 48.4426    | 36.2040    | 34.9760    | 15.7556   | 27.6631   | 12.4414   |
| 548 | TBC1D7        | 2.1405 | 0.0216 | 49.2239    | 75.3634    | 124.0060   | 35.6574   | 47.5459   | 32.9331   |
| 549 | IL4R          | 2.1354 | 0.0321 | 291.4370   | 157.3765   | 136.7245   | 65.5102   | 148.6890  | 60.0115   |
| 550 | NR6A1         | 2.1349 | 0.0307 | 25.0026    | 28.8154    | 44.5150    | 13.2679   | 18.1539   | 14.6369   |
| 551 | FAM20C        | 2.1304 | 0.0222 | 166.4238   | 129.2999   | 257.5508   | 67.1687   | 133.9930  | 58.5478   |
| 552 | EFEMP2        | 2.1301 | 0.0264 | 421.1382   | 180.2810   | 594.5927   | 191.5551  | 226.4914  | 143.4421  |
| 553 | BRE           | 2.1292 | 0.0019 | 1227.4734  | 866.6789   | 753.5747   | 375.6469  | 597.3495  | 364.4599  |
| 554 | LINC00205     | 2.1288 | 0.0095 | 73.4453    | 87.1851    | 108.1078   | 37.3159   | 59.6485   | 29.2739   |
| 555 | IGFBP4        | 2.1287 | 0.0142 | 1132.9322  | 928.0040   | 505.5628   | 325.0631  | 587.8403  | 292.7389  |
| 556 | SAMD1         | 2.1276 | 0.0296 | 98.4479    | 84.9685    | 238.4730   | 57.2177   | 75.2090   | 65.8663   |
| 557 | COL4A2        | 2.1226 | 0.0290 | 627.4100   | 712.2579   | 209.8562   | 194.8720  | 311.2096  | 223.9453  |
| 558 | FSTL4         | 2.1225 | 0.0250 | 28.1280    | 22.9046    | 19.0778    | 9.9509    | 12.1026   | 10.9777   |
| 559 | LIPE          | 2.1221 | 0.0009 | 330.5037   | 282.9821   | 213.0359   | 157.5561  | 133.1285  | 98.7994   |
| 560 | SOCS2         | 2.1188 | 0.0120 | 290.6557   | 359.8232   | 585.0538   | 140.9712  | 277.4952  | 164.6656  |
| 561 | MYH14         | 2.1139 | 0.0325 | 24.2213    | 24.3823    | 12.7186    | 9.1217    | 10.3737   | 9.5140    |
| 562 | ACAP1         | 2.1084 | 0.0181 | 72.6639    | 47.2868    | 95.3892    | 36.4867   | 41.4946   | 24.1510   |
| 563 | SNHG15        | 2.1078 | 0.0085 | 225.0238   | 147.0325   | 305.2455   | 97.8506   | 140.0443  | 83.4306   |
| 564 | PPP1R14A      | 2.1021 | 0.0443 | 1032.1403  | 297.0204   | 505.5628   | 335.0140  | 357.0265  | 180.7663  |
| 565 | IFI35         | 2.0928 | 0.0056 | 332.8477   | 195.7970   | 190.7784   | 125.2156  | 136.5864  | 81.9669   |
| 566 | MTSS1         | 2.0927 | 0.0058 | 457.0795   | 642.0665   | 992.0477   | 262.0407  | 388.1475  | 349.0911  |
| 567 | DOK1          | 2.0922 | 0.0252 | 53.9119    | 36.9428    | 66.7724    | 33.1697   | 17.2894   | 24.8828   |
| 568 | CYGB          | 2.0913 | 0.0226 | 35.1600    | 81.2742    | 47.6946    | 26.5358   | 28.5275   | 23.4191   |
| 569 | ITM2C         | 2.0750 | 0.0316 | 182.8318   | 516.4608   | 282.9880   | 125.2156  | 223.0335  | 125.1459  |

## Transcriptome of primary aldosteronism adrenal glands

|     |           |        |        |           |           |           |           |           |          |
|-----|-----------|--------|--------|-----------|-----------|-----------|-----------|-----------|----------|
| 570 | RPS26     | 2.0745 | 0.0373 | 122.6692  | 114.5228  | 286.1676  | 63.8517   | 116.7036  | 71.7210  |
| 571 | SLC27A5   | 2.0683 | 0.0232 | 55.4746   | 32.5097   | 66.7724   | 28.1942   | 22.4762   | 24.1510  |
| 572 | A4GALT    | 2.0653 | 0.0248 | 54.6933   | 80.5354   | 25.4371   | 24.0480   | 25.9341   | 27.8102  |
| 573 | DXO       | 2.0649 | 0.0431 | 550.0581  | 187.6696  | 327.5029  | 156.7269  | 251.5611  | 107.5815 |
| 574 | TLE2      | 2.0641 | 0.0183 | 380.5089  | 159.5930  | 213.0359  | 157.5561  | 115.8391  | 91.4809  |
| 575 | PDLIM1    | 2.0640 | 0.0022 | 160.9545  | 165.5039  | 120.8263  | 57.2177   | 95.0918   | 64.4026  |
| 576 | SCAP      | 2.0521 | 0.0023 | 2894.8370 | 1505.7899 | 2034.9697 | 1216.4990 | 1025.2627 | 894.3173 |
| 577 | MMAB      | 2.0484 | 0.0003 | 535.2128  | 461.7854  | 750.3951  | 291.0642  | 280.9531  | 281.0293 |
| 578 | MOSPD3    | 2.0460 | 0.0297 | 225.8051  | 140.3828  | 384.7365  | 152.5806  | 128.8062  | 85.6261  |
| 579 | IRF7      | 2.0413 | 0.0440 | 52.3493   | 31.7708   | 31.7964   | 17.4141   | 27.6631   | 11.7096  |
| 580 | DEC2      | 2.0404 | 0.0271 | 196.1145  | 100.4845  | 254.3712  | 121.8987  | 73.4800   | 74.6484  |
| 581 | EFNA1     | 2.0402 | 0.0153 | 135.1705  | 131.5165  | 251.1916  | 78.7781   | 110.6523  | 64.4026  |
| 582 | WDR34     | 2.0388 | 0.0112 | 356.2876  | 192.1027  | 241.6526  | 161.7023  | 140.9088  | 84.8943  |
| 583 | TMEM189   | 2.0374 | 0.0041 | 100.0106  | 92.3571   | 149.4431  | 53.9008   | 64.8353   | 49.0338  |
| 584 | NUPR1     | 2.0369 | 0.0029 | 1320.4520 | 1070.6034 | 1834.6523 | 723.0996  | 837.6724  | 513.7568 |
| 585 | TSPO      | 2.0306 | 0.0200 | 634.4420  | 356.1289  | 947.5328  | 373.1592  | 344.9239  | 236.3867 |
| 586 | EIF4A3    | 2.0254 | 0.0190 | 1294.6680 | 919.1377  | 1316.3710 | 412.9628  | 931.8998  | 398.1249 |
| 587 | CLTCL1    | 2.0238 | 0.0096 | 220.3358  | 149.2491  | 343.4011  | 123.5572  | 112.3812  | 116.3637 |
| 588 | TMEM132C  | 2.0231 | 0.0421 | 30.4720   | 48.0257   | 15.8982   | 13.2679   | 17.2894   | 16.1006  |
| 589 | NOXA1     | 2.0226 | 0.0457 | 149.2345  | 61.3251   | 60.4132   | 55.5593   | 48.4104   | 30.0057  |
| 590 | TRAPPC2P1 | 2.0219 | 0.0343 | 81.2586   | 91.6182   | 127.1856  | 29.0235   | 76.9379   | 42.4471  |
| 591 | DHRS3     | 2.0199 | 0.0065 | 147.6718  | 104.9177  | 190.7784  | 71.3149   | 88.1760   | 60.0115  |
| 592 | GRK5      | 2.0198 | 0.0279 | 289.8744  | 190.6250  | 85.8503   | 95.3629   | 99.4142   | 85.6261  |
| 593 | TUBA1A    | 2.0172 | 0.0142 | 425.8262  | 709.3024  | 550.0777  | 174.9702  | 402.8435  | 257.6102 |
| 594 | MMP2      | 2.0113 | 0.0360 | 460.9862  | 374.6003  | 244.8323  | 109.4600  | 293.0557  | 134.6599 |
| 595 | MYO15B    | 2.0084 | 0.0463 | 631.3167  | 200.2302  | 403.8143  | 269.5039  | 210.9309  | 134.6599 |
| 596 | CRISPLD2  | 2.0036 | 0.0187 | 182.0505  | 221.6570  | 152.6227  | 56.3885   | 140.0443  | 81.2350  |
| 597 | RAMP3     | 2.0032 | 0.0329 | 231.2744  | 188.4085  | 158.9820  | 69.6564   | 159.9271  | 59.2796  |
| 598 | FTH1P11   | 1.9983 | 0.0338 | 153.1412  | 164.7650  | 400.6347  | 121.0694  | 133.1285  | 105.3860 |
| 599 | IRF1      | 1.9896 | 0.0353 | 106.2612  | 82.7519   | 216.2155  | 58.8762   | 80.3958   | 64.4026  |
| 600 | CERCAM    | 1.9883 | 0.0217 | 69.5386   | 46.5480   | 38.1557   | 29.0235   | 30.2565   | 18.2962  |
| 601 | ZFAND2A   | 1.9846 | 0.0341 | 84.3839   | 90.8794   | 203.4970  | 69.6564   | 55.3261   | 65.8663  |
| 602 | AVPI1     | 1.9834 | 0.0218 | 546.1514  | 493.5563  | 270.2694  | 194.0428  | 316.3964  | 150.0287 |
| 603 | DGAT1     | 1.9834 | 0.0328 | 1375.9266 | 521.6328  | 823.5268  | 552.2756  | 524.7339  | 294.9344 |
| 604 | DAGLB     | 1.9829 | 0.0241 | 238.3064  | 164.0262  | 432.4311  | 131.8496  | 162.5206  | 126.6096 |
| 605 | LAGE3     | 1.9827 | 0.0280 | 181.2691  | 130.7776  | 270.2694  | 118.5817  | 115.8391  | 59.2796  |
| 606 | C7orf50   | 1.9810 | 0.0304 | 239.0878  | 137.4273  | 378.3772  | 158.3853  | 115.8391  | 106.8497 |
| 607 | PC        | 1.9787 | 0.0011 | 546.1514  | 452.1803  | 709.0597  | 337.5018  | 280.9531  | 244.4370 |
| 608 | ADM       | 1.9716 | 0.0056 | 132.0452  | 85.7074   | 139.9042  | 66.3394   | 63.1064   | 51.9612  |
| 609 | CMTM3     | 1.9664 | 0.0369 | 107.8239  | 119.6948  | 98.5688   | 30.6820   | 89.0405   | 46.1064  |
| 610 | ACAA2     | 1.9655 | 0.0002 | 493.0208  | 370.9061  | 349.7604  | 199.8475  | 208.3375  | 209.3083 |
| 611 | TRAPPC6A  | 1.9598 | 0.0176 | 167.9865  | 110.8285  | 200.3173  | 111.1185  | 72.6156   | 60.7433  |
| 612 | IMPA2     | 1.9535 | 0.0053 | 78.1333   | 62.8028   | 73.1317   | 36.4867   | 42.3591   | 30.7376  |
| 613 | NRIP3     | 1.9499 | 0.0356 | 53.1306   | 129.2999  | 82.6706   | 37.3159   | 56.1906   | 42.4471  |
| 614 | MVD       | 1.9487 | 0.0397 | 303.9384  | 582.2191  | 416.5329  | 351.5989  | 138.3154  | 178.5707 |
| 615 | S100A4    | 1.9442 | 0.0070 | 107.0426  | 107.8731  | 104.9281  | 39.8036   | 73.4800   | 51.2293  |
| 616 | UBE2S     | 1.9426 | 0.0493 | 50.0053   | 33.2486   | 47.6946   | 25.7065   | 28.5275   | 13.1733  |
| 617 | HBEGF     | 1.9411 | 0.0425 | 69.5386   | 39.1594   | 31.7964   | 19.9018   | 31.9854   | 20.4917  |
| 618 | HECW2     | 1.9380 | 0.0211 | 70.3199   | 96.7902   | 92.2096   | 29.8527   | 62.2419   | 41.7153  |
| 619 | JUP       | 1.9347 | 0.0080 | 135.9519  | 106.3954  | 92.2096   | 53.0715   | 75.2090   | 44.6427  |
| 620 | TPST2     | 1.9293 | 0.0037 | 335.9730  | 243.8227  | 314.7844  | 162.5316  | 188.4547  | 112.7045 |
| 621 | LDHD      | 1.9287 | 0.0338 | 82.8212   | 170.6759  | 184.4191  | 95.3629   | 76.0735   | 55.6204  |

## Transcriptome of primary aldosteronism adrenal glands

|     |               |        |        |           |           |           |           |           |           |
|-----|---------------|--------|--------|-----------|-----------|-----------|-----------|-----------|-----------|
| 622 | FTH1P8        | 1.9231 | 0.0340 | 341.4423  | 336.9187  | 696.3412  | 208.9691  | 330.2279  | 175.6433  |
| 623 | TUBB6         | 1.9219 | 0.0097 | 96.8852   | 85.7074   | 104.9281  | 55.5593   | 59.6485   | 34.3968   |
| 624 | OCEL1         | 1.9209 | 0.0273 | 87.5092   | 60.5862   | 133.5449  | 55.5593   | 44.9525   | 46.1064   |
| 625 | NSMCE1        | 1.9190 | 0.0152 | 381.2903  | 302.9312  | 664.5448  | 259.5529  | 242.0519  | 201.2580  |
| 626 | CCDC12        | 1.9159 | 0.0303 | 531.3061  | 322.8804  | 833.0657  | 330.8678  | 330.2279  | 219.5542  |
| 627 | SLC2A8        | 1.9137 | 0.0230 | 374.2583  | 263.0330  | 642.2873  | 258.7237  | 215.2533  | 194.6714  |
| 628 | TMUB1         | 1.9046 | 0.0366 | 214.8664  | 131.5165  | 292.5269  | 155.0684  | 97.6852   | 82.6987   |
| 629 | ARVCF         | 1.9026 | 0.0277 | 183.6131  | 113.7839  | 82.6706   | 80.4365   | 71.7511   | 47.5701   |
| 630 | FBXO25        | 1.9018 | 0.0411 | 171.8932  | 217.9627  | 454.6885  | 123.5572  | 166.8429  | 153.6879  |
| 631 | FTH1P20       | 1.9008 | 0.0204 | 218.7731  | 210.5742  | 441.9700  | 148.4344  | 169.4363  | 140.5147  |
| 632 | TXN           | 1.8989 | 0.0463 | 357.0690  | 474.3460  | 1011.1256 | 274.4793  | 395.0633  | 300.7892  |
| 633 | CRYAB         | 1.8929 | 0.0170 | 178.1438  | 234.2176  | 209.8562  | 91.2167   | 159.9271  | 77.5758   |
| 634 | SRR           | 1.8924 | 0.0380 | 28.1280   | 29.5543   | 31.7964   | 15.7556   | 14.6960   | 16.8325   |
| 635 | NSFL1C        | 1.8917 | 0.0091 | 927.4417  | 761.0224  | 1408.5806 | 495.8871  | 679.4742  | 461.7956  |
| 636 | FGD4          | 1.8874 | 0.0333 | 107.8239  | 143.3382  | 73.1317   | 35.6574   | 62.2419   | 73.9166   |
| 637 | TMCC2         | 1.8818 | 0.0141 | 58.5999   | 65.0194   | 54.0539   | 38.1452   | 32.8499   | 23.4191   |
| 638 | CTSK          | 1.8754 | 0.0303 | 73.4453   | 71.6691   | 130.3652  | 39.8036   | 58.7840   | 48.3019   |
| 639 | CLSTN3        | 1.8749 | 0.0053 | 266.4344  | 396.7660  | 343.4011  | 224.7248  | 140.9088  | 171.2523  |
| 640 | MCF2L         | 1.8741 | 0.0369 | 46.0986   | 79.0577   | 41.3353   | 33.1697   | 33.7144   | 21.9554   |
| 641 | SLC9A3R2      | 1.8559 | 0.0221 | 585.2181  | 315.4918  | 378.3772  | 218.9201  | 303.4293  | 166.8612  |
| 642 | HOXA5         | 1.8547 | 0.0237 | 1087.6149 | 1745.9184 | 1370.4249 | 566.3727  | 1117.7611 | 582.5504  |
| 643 | TSC22D3       | 1.8529 | 0.0039 | 3271.4393 | 2124.2130 | 3704.2807 | 1670.0947 | 1801.5577 | 1439.5435 |
| 644 | RXRA          | 1.8526 | 0.0155 | 786.8019  | 554.8814  | 378.3772  | 271.1623  | 382.0962  | 275.1746  |
| 645 | AKR1C1        | 1.8487 | 0.0446 | 60.1626   | 61.3251   | 31.7964   | 25.7065   | 19.8828   | 37.3242   |
| 646 | ARRB1         | 1.8484 | 0.0274 | 64.8506   | 74.6245   | 120.8263  | 44.7791   | 53.5972   | 42.4471   |
| 647 | PPP4R1L       | 1.8428 | 0.0452 | 93.7599   | 62.8028   | 31.7964   | 31.5112   | 36.3078   | 34.3968   |
| 648 | SLC1A4        | 1.8413 | 0.0002 | 475.0502  | 622.8562  | 556.4370  | 281.9425  | 302.5649  | 313.9625  |
| 649 | CTD-2517010.6 | 1.8393 | 0.0433 | 78.9146   | 64.2805   | 82.6706   | 30.6820   | 61.3774   | 30.7376   |
| 650 | ARHGEF17      | 1.8371 | 0.0036 | 234.3998  | 228.3067  | 162.1616  | 134.3373  | 110.6523  | 95.1401   |
| 651 | AIFM2         | 1.8315 | 0.0078 | 247.6824  | 147.7713  | 209.8562  | 113.6062  | 121.0259  | 95.8720   |
| 652 | MARVELD1      | 1.8252 | 0.0211 | 83.6026   | 82.0131   | 60.4132   | 53.0715   | 41.4946   | 29.2739   |
| 653 | COL3A1        | 1.8190 | 0.0054 | 553.9648  | 504.6391  | 772.6525  | 275.3086  | 402.8435  | 328.5994  |
| 654 | FBXW5         | 1.8121 | 0.0193 | 998.5430  | 574.8305  | 1096.9758 | 621.1027  | 438.2868  | 414.2255  |
| 655 | CSRP1         | 1.8106 | 0.0003 | 806.3352  | 804.6149  | 648.6466  | 391.4025  | 469.4078  | 387.1472  |
| 656 | COPZ2         | 1.8066 | 0.0271 | 137.5145  | 106.3954  | 190.7784  | 86.2412   | 95.0918   | 59.2796   |
| 657 | TMSB10        | 1.8058 | 0.0292 | 1192.3134 | 1162.2216 | 1710.6464 | 566.3727  | 1111.7098 | 573.0364  |
| 658 | RARA          | 1.8046 | 0.0451 | 150.7972  | 82.0131   | 111.2874  | 77.9488   | 71.7511   | 40.9834   |
| 659 | CYB5R3        | 1.8017 | 0.0010 | 1593.1370 | 1377.2289 | 1151.0297 | 845.8275  | 796.1778  | 645.4893  |
| 660 | TUB           | 1.8015 | 0.0454 | 181.2691  | 240.8673  | 98.5688   | 93.7044   | 123.6194  | 71.7210   |
| 661 | GSTP1         | 1.7905 | 0.0363 | 1545.4757 | 1077.9919 | 2530.9935 | 1044.0165 | 1087.5046 | 747.2160  |
| 662 | EBP           | 1.7862 | 0.0009 | 932.9110  | 1279.6998 | 998.4070  | 645.9800  | 618.9613  | 532.7848  |
| 663 | DDAH2         | 1.7815 | 0.0291 | 182.0505  | 110.0896  | 216.2155  | 113.6062  | 89.0405   | 82.6987   |
| 664 | WNT11         | 1.7772 | 0.0463 | 393.0103  | 201.7079  | 197.1377  | 138.4835  | 193.6415  | 113.4363  |
| 665 | WWC3          | 1.7765 | 0.0215 | 382.0716  | 364.2564  | 648.6466  | 221.4078  | 321.5832  | 242.2414  |
| 666 | IDH2          | 1.7703 | 0.0480 | 78.9146   | 57.6308   | 92.2096   | 42.2914   | 56.1906   | 30.7376   |
| 667 | POLR2L        | 1.7696 | 0.0373 | 817.2738  | 391.5940  | 833.0657  | 466.0344  | 371.7226  | 316.1580  |
| 668 | ZBED1         | 1.7662 | 0.0396 | 489.8955  | 861.5069  | 372.0179  | 275.3086  | 391.6054  | 308.8395  |
| 669 | GZF1          | 1.7589 | 0.0319 | 407.0742  | 673.0984  | 565.9759  | 220.5785  | 431.3711  | 283.9567  |
| 670 | FNDC4         | 1.7571 | 0.0156 | 959.4763  | 762.5001  | 1173.2872 | 508.3257  | 720.1044  | 419.3485  |
| 671 | TMEM102       | 1.7513 | 0.0266 | 62.5066   | 72.4080   | 44.5150   | 41.4621   | 30.2565   | 30.7376   |
| 672 | ITPK1         | 1.7491 | 0.0028 | 243.7757  | 259.3387  | 209.8562  | 156.7269  | 137.4509  | 113.4363  |
| 673 | SAT1          | 1.7467 | 0.0219 | 2304.9309 | 2653.2344 | 2988.8617 | 1183.3292 | 2179.3315 | 1187.0562 |

## Transcriptome of primary aldosteronism adrenal glands

|     |          |        |        |           |           |           |           |           |           |
|-----|----------|--------|--------|-----------|-----------|-----------|-----------|-----------|-----------|
| 674 | SH2D3C   | 1.7395 | 0.0330 | 89.0719   | 75.3634   | 50.8742   | 38.9744   | 51.8683   | 32.9331   |
| 675 | RRAS     | 1.7391 | 0.0292 | 277.3730  | 164.0262  | 178.0598  | 114.4355  | 149.5535  | 92.2128   |
| 676 | IFITM3   | 1.7361 | 0.0295 | 1826.7554 | 1165.9159 | 1627.9757 | 765.3910  | 1239.6515 | 656.4670  |
| 677 | ARAP3    | 1.7345 | 0.0313 | 119.5439  | 103.4399  | 73.1317   | 56.3885   | 72.6156   | 41.7153   |
| 678 | NLGN3    | 1.7317 | 0.0359 | 179.7065  | 115.2616  | 79.4910   | 76.2903   | 72.6156   | 67.3299   |
| 679 | GNG7     | 1.7273 | 0.0442 | 118.7625  | 68.7137   | 130.3652  | 63.0224   | 68.2932   | 52.6930   |
| 680 | THAP2    | 1.7270 | 0.0166 | 87.5092   | 122.6502  | 85.8503   | 51.4130   | 66.5643   | 53.4248   |
| 681 | HOTAIRM1 | 1.7257 | 0.0353 | 142.2025  | 114.5228  | 222.5748  | 84.5827   | 104.6010  | 88.5535   |
| 682 | TIMP2    | 1.7152 | 0.0187 | 993.0736  | 1228.7187 | 1144.6704 | 460.2297  | 882.6249  | 619.8746  |
| 683 | USP36    | 1.7110 | 0.0299 | 777.4259  | 381.9889  | 492.8442  | 364.8668  | 305.1583  | 295.6663  |
| 684 | EZR      | 1.7068 | 0.0036 | 2145.5391 | 2407.1951 | 3090.6102 | 1359.1287 | 1721.1619 | 1397.8282 |
| 685 | CRY1     | 1.6957 | 0.0264 | 131.2639  | 208.3576  | 130.3652  | 76.2903   | 107.1944  | 93.6764   |
| 686 | PLXNA3   | 1.6955 | 0.0416 | 193.7705  | 150.7268  | 104.9281  | 105.3138  | 96.8208   | 62.9389   |
| 687 | PXDN     | 1.6884 | 0.0383 | 112.5119  | 96.0514   | 92.2096   | 52.2423   | 81.2603   | 44.6427   |
| 688 | PALLD    | 1.6809 | 0.0442 | 526.6181  | 797.9652  | 680.4430  | 265.3576  | 545.4812  | 382.0243  |
| 689 | DMTN     | 1.6791 | 0.0208 | 185.1758  | 159.5930  | 228.9341  | 141.8005  | 95.9563   | 103.9223  |
| 690 | NR1H3    | 1.6754 | 0.0269 | 202.3651  | 124.1279  | 178.0598  | 104.4846  | 113.2457  | 83.4306   |
| 691 | ACTB     | 1.6722 | 0.0268 | 6443.6493 | 5180.8631 | 9465.7886 | 4046.7041 | 5038.1373 | 3527.5036 |
| 692 | OAZ1     | 1.6720 | 0.0263 | 2293.9923 | 2031.1171 | 3691.5622 | 1441.2237 | 1865.5285 | 1487.8454 |
| 693 | MYADM    | 1.6571 | 0.0314 | 106.2612  | 79.7965   | 73.1317   | 63.0224   | 45.8170   | 47.5701   |
| 694 | DEAF1    | 1.6530 | 0.0236 | 246.9011  | 190.6250  | 260.7305  | 179.1164  | 126.2128  | 117.0956  |
| 695 | C9orf3   | 1.6512 | 0.0178 | 228.9304  | 285.1987  | 248.0119  | 159.2146  | 186.7257  | 115.6319  |
| 696 | EHD3     | 1.6504 | 0.0056 | 173.4558  | 148.5102  | 149.4431  | 103.6553  | 89.0405   | 92.9446   |
| 697 | OTUD1    | 1.6401 | 0.0190 | 207.8345  | 281.5044  | 251.1916  | 128.5326  | 187.5902  | 135.3917  |
| 698 | AGPAT2   | 1.6329 | 0.0288 | 217.2104  | 149.9879  | 213.0359  | 128.5326  | 133.1285  | 93.6764   |
| 699 | SAMHD1   | 1.6304 | 0.0497 | 529.7435  | 681.2259  | 565.9759  | 254.5775  | 516.9537  | 318.3535  |
| 700 | NAB2     | 1.6273 | 0.0395 | 175.0185  | 166.9816  | 117.6467  | 104.4846  | 110.6523  | 67.3299   |
| 701 | PACSIN3  | 1.6193 | 0.0342 | 1051.6736 | 605.1236  | 957.0717  | 607.0056  | 568.8220  | 438.3765  |
| 702 | ALDH2    | 1.6180 | 0.0271 | 2625.2773 | 1789.5109 | 1713.8260 | 1178.3538 | 1562.9637 | 1046.5415 |
| 703 | NSDHL    | 1.6155 | 0.0174 | 352.3810  | 532.7157  | 387.9161  | 289.4057  | 273.1729  | 225.4089  |
| 704 | GGT5     | 1.6123 | 0.0464 | 396.9169  | 311.0587  | 521.4610  | 268.6746  | 304.2938  | 189.5484  |
| 705 | CDADC1   | 1.6089 | 0.0325 | 143.7652  | 164.7650  | 213.0359  | 98.6799   | 95.9563   | 129.5370  |
| 706 | SOD1     | 1.6086 | 0.0072 | 3413.6418 | 3475.5819 | 4705.8674 | 2521.7269 | 2574.3948 | 2112.1111 |
| 707 | VMP1     | 1.6029 | 0.0331 | 954.0070  | 942.0423  | 661.3651  | 416.2798  | 683.7966  | 495.4606  |
| 708 | FZR1     | 1.5978 | 0.0400 | 497.7088  | 311.0587  | 321.1437  | 287.7472  | 215.2533  | 204.1854  |
| 709 | BLVRB    | 1.5876 | 0.0320 | 298.4690  | 212.7907  | 317.9640  | 205.6522  | 170.3008  | 146.3694  |
| 710 | OLFM1    | 1.5853 | 0.0476 | 114.8559  | 167.7205  | 155.8024  | 87.8997   | 113.2457  | 75.3803   |
| 711 | TMEM55B  | 1.5808 | 0.0236 | 332.8477  | 358.3455  | 273.4490  | 252.9190  | 191.9126  | 165.3975  |
| 712 | GSTA4    | 1.5743 | 0.0167 | 4096.5264 | 4022.3358 | 3761.5143 | 2085.5452 | 3238.3086 | 2222.6200 |
| 713 | TAGLN2   | 1.5733 | 0.0162 | 799.3032  | 654.6270  | 947.5328  | 571.3482  | 519.5471  | 435.4491  |
| 714 | STAT5A   | 1.5640 | 0.0291 | 515.6795  | 413.7597  | 356.1197  | 336.6725  | 253.2900  | 231.9956  |
| 715 | GSTA3    | 1.5499 | 0.0142 | 321.9090  | 275.5935  | 219.3952  | 177.4579  | 179.8100  | 169.7886  |
| 716 | MEPCE    | 1.5387 | 0.0130 | 603.1887  | 471.3906  | 581.8741  | 402.1827  | 359.6200  | 314.6943  |
| 717 | NGFRAP1  | 1.5358 | 0.0172 | 2593.2426 | 2002.3016 | 2899.8318 | 1776.2377 | 1677.9383 | 1426.3702 |
| 718 | FSTL1    | 1.5330 | 0.0400 | 2712.0052 | 2453.7431 | 3061.9934 | 1352.4947 | 2312.4601 | 1702.2767 |
| 719 | VAPB     | 1.5309 | 0.0325 | 705.5433  | 820.8698  | 562.7963  | 362.3790  | 517.8182  | 484.4829  |
| 720 | ARMCX2   | 1.5199 | 0.0379 | 593.8127  | 884.4115  | 553.2574  | 425.4015  | 486.6972  | 424.4714  |
| 721 | GLUL     | 1.5186 | 0.0178 | 1168.0921 | 1197.6867 | 1634.3350 | 805.1946  | 935.3577  | 893.5855  |
| 722 | QDPR     | 1.5134 | 0.0102 | 453.9542  | 530.4991  | 543.7185  | 334.1848  | 372.5870  | 302.9848  |
| 723 | FTH1     | 1.5055 | 0.0372 | 1673.6143 | 1652.0836 | 1488.0716 | 1367.4211 | 995.0062  | 835.0377  |
| 724 | DAZAP1   | 1.5054 | 0.0312 | 973.5403  | 721.1241  | 775.8322  | 658.4187  | 509.1734  | 473.5052  |

D1, D2 and D3: Disease affected-adrenals; C1, C2 and C3: Disease non-affected control tissues.

## Transcriptome of primary aldosteronism adrenal glands

**Table S2.** Down-regulated genes in primary aldosteronism

| Rank | Gene          | Fold change | P value | D1      | D2       | D3       | C1       | C2      | C3       |
|------|---------------|-------------|---------|---------|----------|----------|----------|---------|----------|
| 1    | HAS2          | 0.0507      | 0.0014  | 0.0000  | 3.6943   | 0.0000   | 9.1217   | 48.4104 | 15.3688  |
| 2    | HOXD10        | 0.0560      | 0.0449  | 0.0000  | 0.7389   | 0.0000   | 4.1462   | 1.7289  | 7.3185   |
| 3    | DDX50P1       | 0.0573      | 0.0332  | 0.0000  | 0.7389   | 0.0000   | 3.3170   | 5.1868  | 4.3911   |
| 4    | GALNT5        | 0.0587      | 0.0063  | 0.0000  | 2.2166   | 0.0000   | 4.1462   | 23.3407 | 10.2459  |
| 5    | PTPRT         | 0.0627      | 0.0044  | 1.5627  | 0.0000   | 0.0000   | 9.9509   | 6.9158  | 8.0503   |
| 6    | IGFL4         | 0.0707      | 0.0000  | 11.7200 | 2.9554   | 0.0000   | 82.0950  | 54.4617 | 70.9892  |
| 7    | IGFN1         | 0.0731      | 0.0010  | 3.9067  | 2.9554   | 0.0000   | 45.6083  | 4.3224  | 43.9108  |
| 8    | RIMKLBP2      | 0.0923      | 0.0024  | 0.7813  | 2.2166   | 0.0000   | 10.7802  | 7.7802  | 13.9051  |
| 9    | RP11-219B17.1 | 0.0925      | 0.0087  | 0.7813  | 1.4777   | 0.0000   | 9.1217   | 4.3224  | 10.9777  |
| 10   | HEXA-AS1      | 0.0932      | 0.0396  | 0.0000  | 1.4777   | 0.0000   | 5.8047   | 3.4579  | 6.5866   |
| 11   | DHRS9         | 0.0942      | 0.0374  | 1.5627  | 0.0000   | 0.0000   | 5.8047   | 3.4579  | 7.3185   |
| 12   | PTPN20CP      | 0.1011      | 0.0457  | 1.5627  | 0.0000   | 0.0000   | 4.1462   | 6.9158  | 4.3911   |
| 13   | AC018766.6    | 0.1025      | 0.0445  | 1.5627  | 0.0000   | 0.0000   | 5.8047   | 4.3224  | 5.1229   |
| 14   | COL11A1       | 0.1067      | 0.0001  | 48.4426 | 13.2994  | 34.9760  | 421.2553 | 51.8683 | 433.2536 |
| 15   | RP5-1184F4.5  | 0.1084      | 0.0158  | 1.5627  | 0.7389   | 0.0000   | 5.8047   | 5.1868  | 10.2459  |
| 16   | CLRN1-AS1     | 0.1088      | 0.0278  | 2.3440  | 0.0000   | 0.0000   | 4.9755   | 7.7802  | 8.7822   |
| 17   | QRFP          | 0.1138      | 0.0026  | 2.3440  | 1.4777   | 3.1796   | 33.1697  | 3.4579  | 24.8828  |
| 18   | RP11-701H24.3 | 0.1195      | 0.0253  | 0.7813  | 1.4777   | 0.0000   | 5.8047   | 4.3224  | 8.7822   |
| 19   | RP11-164N3.3  | 0.1210      | 0.0293  | 1.5627  | 0.7389   | 0.0000   | 3.3170   | 6.9158  | 8.7822   |
| 20   | ANGPT2        | 0.1225      | 0.0007  | 4.6880  | 4.4331   | 0.0000   | 28.1942  | 10.3737 | 35.8605  |
| 21   | SP5           | 0.1235      | 0.0059  | 2.3440  | 2.2166   | 0.0000   | 19.9018  | 6.0513  | 10.9777  |
| 22   | HS6ST3        | 0.1258      | 0.0130  | 0.7813  | 5.9109   | 0.0000   | 22.3896  | 5.1868  | 25.6147  |
| 23   | CLIC6         | 0.1306      | 0.0230  | 2.3440  | 0.7389   | 0.0000   | 12.4386  | 6.0513  | 5.1229   |
| 24   | RP11-171A24.3 | 0.1366      | 0.0280  | 4.6880  | 2.9554   | 0.0000   | 38.1452  | 1.7289  | 16.1006  |
| 25   | CABP7         | 0.1374      | 0.0039  | 26.5653 | 68.7137  | 0.0000   | 368.1837 | 78.6669 | 246.6325 |
| 26   | SEMA3D        | 0.1397      | 0.0005  | 55.4746 | 69.4525  | 9.5389   | 332.5263 | 78.6669 | 551.0810 |
| 27   | PRSS35        | 0.1405      | 0.0009  | 27.3466 | 10.3440  | 15.8982  | 165.8485 | 17.2894 | 198.3306 |
| 28   | RP11-673E1.1  | 0.1410      | 0.0483  | 1.5627  | 0.7389   | 0.0000   | 4.1462   | 7.7802  | 4.3911   |
| 29   | HOXA11        | 0.1420      | 0.0135  | 3.1253  | 2.9554   | 12.7186  | 65.5102  | 1.7289  | 65.1344  |
| 30   | LMAN1L        | 0.1445      | 0.0483  | 11.7200 | 1.4777   | 0.0000   | 58.8762  | 1.7289  | 30.7376  |
| 31   | RP11-134K13.2 | 0.1475      | 0.0121  | 1.5627  | 2.9554   | 0.0000   | 14.9264  | 6.9158  | 8.7822   |
| 32   | AP000688.29   | 0.1557      | 0.0007  | 6.2507  | 5.1720   | 0.0000   | 34.8282  | 17.2894 | 21.2236  |
| 33   | SPACA6P-AS    | 0.1559      | 0.0328  | 1.5627  | 1.4777   | 0.0000   | 7.4632   | 6.9158  | 5.1229   |
| 34   | NDNF          | 0.1562      | 0.0003  | 11.7200 | 8.1274   | 3.1796   | 66.3394  | 18.1539 | 62.9389  |
| 35   | RP11-276H19.1 | 0.1625      | 0.0128  | 4.6880  | 1.4777   | 0.0000   | 14.9264  | 6.9158  | 16.1006  |
| 36   | CDKL5         | 0.1636      | 0.0357  | 2.3440  | 2.9554   | 0.0000   | 10.7802  | 2.5934  | 19.0280  |
| 37   | ENPP6         | 0.1769      | 0.0253  | 11.7200 | 5.1720   | 0.0000   | 47.2668  | 4.3224  | 43.9108  |
| 38   | HIST2H2BA     | 0.1847      | 0.0106  | 7.0320  | 8.1274   | 0.0000   | 40.6329  | 7.7802  | 33.6650  |
| 39   | PCDHB12       | 0.1908      | 0.0157  | 3.1253  | 3.6943   | 0.0000   | 14.9264  | 6.9158  | 13.9051  |
| 40   | MAL2          | 0.1925      | 0.0058  | 3.9067  | 5.9109   | 0.0000   | 20.7311  | 11.2381 | 19.0280  |
| 41   | RP1-78014.1   | 0.1933      | 0.0163  | 0.0000  | 0.7389   | 3.1796   | 6.6339   | 7.7802  | 5.8548   |
| 42   | SLC9A2        | 0.1933      | 0.0020  | 0.7813  | 3.6943   | 15.8982  | 30.6820  | 24.2052 | 50.4975  |
| 43   | RP11-384P7.7  | 0.1998      | 0.0327  | 1.5627  | 4.4331   | 0.0000   | 7.4632   | 8.6447  | 13.9051  |
| 44   | RP3-468K18.6  | 0.2013      | 0.0351  | 3.1253  | 2.2166   | 0.0000   | 12.4386  | 6.0513  | 8.0503   |
| 45   | AP001468.1    | 0.2048      | 0.0449  | 3.1253  | 2.9554   | 0.0000   | 16.5849  | 4.3224  | 8.7822   |
| 46   | RP11-61A14.2  | 0.2052      | 0.0279  | 2.3440  | 5.9109   | 0.0000   | 6.6339   | 13.8315 | 19.7599  |
| 47   | KCNA4         | 0.2056      | 0.0001  | 52.3493 | 39.8983  | 38.1557  | 288.5764 | 73.4800 | 272.2472 |
| 48   | RELN          | 0.2066      | 0.0165  | 48.4426 | 106.3954 | 143.0838 | 620.2735 | 25.9341 | 795.5179 |
| 49   | ATP2B2        | 0.2134      | 0.0028  | 7.8133  | 17.7326  | 54.0539  | 175.7994 | 44.9525 | 152.2242 |
| 50   | DDIT4L        | 0.2269      | 0.0059  | 7.0320  | 5.1720   | 3.1796   | 29.0235  | 9.5092  | 29.2739  |

## Transcriptome of primary aldosteronism adrenal glands

|     |                |        |        |           |          |           |           |          |           |
|-----|----------------|--------|--------|-----------|----------|-----------|-----------|----------|-----------|
| 51  | CDKL2          | 0.2303 | 0.0071 | 3.1253    | 7.3886   | 3.1796    | 15.7556   | 12.9671  | 30.7376   |
| 52  | RORB           | 0.2317 | 0.0004 | 53.9119   | 59.1085  | 22.2575   | 213.1154  | 79.5313  | 291.2752  |
| 53  | ZNF442         | 0.2352 | 0.0298 | 3.1253    | 5.1720   | 0.0000    | 14.9264   | 8.6447   | 11.7096   |
| 54  | SIGLEC8        | 0.2374 | 0.0035 | 14.0640   | 19.9491  | 3.1796    | 30.6820   | 86.4471  | 39.5198   |
| 55  | TMEM252        | 0.2425 | 0.0481 | 8.5947    | 8.1274   | 0.0000    | 25.7065   | 5.1868   | 38.0561   |
| 56  | RP11-414J4.2   | 0.2466 | 0.0164 | 39.0666   | 15.5160  | 12.7186   | 174.9702  | 18.1539  | 79.7713   |
| 57  | C9orf84        | 0.2469 | 0.0000 | 83.6026   | 87.9239  | 117.6467  | 443.6448  | 172.8942 | 554.7402  |
| 58  | SCAND3         | 0.2470 | 0.0378 | 4.6880    | 13.2994  | 0.0000    | 28.1942   | 9.5092   | 35.1287   |
| 59  | LGR5           | 0.2476 | 0.0028 | 10.1573   | 28.8154  | 9.5389    | 88.7290   | 31.1210  | 76.1121   |
| 60  | AC011290.5     | 0.2556 | 0.0473 | 4.6880    | 2.9554   | 0.0000    | 11.6094   | 9.5092   | 8.7822    |
| 61  | C11orf45       | 0.2585 | 0.0036 | 22.6586   | 22.9046  | 12.7186   | 106.9723  | 23.3407  | 95.1401   |
| 62  | GRM3           | 0.2603 | 0.0141 | 33.5973   | 19.9491  | 0.0000    | 94.5337   | 42.3591  | 68.7936   |
| 63  | SSTR1          | 0.2613 | 0.0342 | 4.6880    | 1.4777   | 41.3353   | 71.3149   | 47.5459  | 62.9389   |
| 64  | DPY19L2P2      | 0.2620 | 0.0006 | 14.0640   | 12.5606  | 15.8982   | 65.5102   | 25.0697  | 71.7210   |
| 65  | PCDHGA12       | 0.2667 | 0.0196 | 30.4720   | 22.1657  | 0.0000    | 73.8026   | 32.8499  | 90.7491   |
| 66  | ADRA2A         | 0.2713 | 0.0060 | 15.6267   | 18.4714  | 0.0000    | 41.4621   | 33.7144  | 50.4975   |
| 67  | ATP2B3         | 0.2719 | 0.0007 | 119.5439  | 64.2805  | 190.7784  | 655.1017  | 215.2533 | 507.1701  |
| 68  | KCND3          | 0.2772 | 0.0029 | 22.6586   | 22.9046  | 95.3892   | 142.6297  | 119.2970 | 246.6325  |
| 69  | INE1           | 0.2805 | 0.0268 | 7.8133    | 6.6497   | 0.0000    | 18.2433   | 12.1026  | 21.2236   |
| 70  | PACSIN1        | 0.2836 | 0.0436 | 4.6880    | 8.8663   | 0.0000    | 22.3896   | 12.9671  | 12.4414   |
| 71  | DNAH7          | 0.2836 | 0.0342 | 4.6880    | 8.8663   | 0.0000    | 14.9264   | 13.8315  | 19.0280   |
| 72  | RANBP3L        | 0.2854 | 0.0158 | 4.6880    | 11.8217  | 6.3593    | 38.1452   | 11.2381  | 30.7376   |
| 73  | RP11-1109F11.3 | 0.2887 | 0.0222 | 3.9067    | 3.6943   | 3.1796    | 14.9264   | 7.7802   | 14.6369   |
| 74  | RPL39L         | 0.2895 | 0.0348 | 2.3440    | 5.9109   | 3.1796    | 15.7556   | 6.9158   | 16.8325   |
| 75  | GML            | 0.2966 | 0.0410 | 287.5304  | 16.9937  | 222.5748  | 900.5575  | 267.1216 | 609.6287  |
| 76  | MEGF10         | 0.2970 | 0.0064 | 35.9413   | 121.1725 | 28.6168   | 220.5785  | 120.1615 | 284.6886  |
| 77  | CRLF1          | 0.3016 | 0.0094 | 7.8133    | 16.9937  | 9.5389    | 27.3650   | 63.1064  | 23.4191   |
| 78  | ESM1           | 0.3028 | 0.0203 | 7.0320    | 12.5606  | 3.1796    | 31.5112   | 12.9671  | 30.7376   |
| 79  | KCNK1          | 0.3050 | 0.0001 | 14.0640   | 19.9491  | 28.6168   | 86.2412   | 46.6814  | 72.4529   |
| 80  | FSIP2          | 0.3051 | 0.0055 | 10.9387   | 19.9491  | 6.3593    | 37.3159   | 27.6631  | 57.0841   |
| 81  | AC007392.3     | 0.3069 | 0.0231 | 14.0640   | 9.6051   | 9.5389    | 48.9253   | 9.5092   | 49.7656   |
| 82  | PDE2A          | 0.3071 | 0.0240 | 1272.0093 | 361.3009 | 1275.0357 | 5180.2788 | 636.2507 | 3654.8451 |
| 83  | GPR63          | 0.3087 | 0.0061 | 12.5013   | 9.6051   | 6.3593    | 32.3405   | 18.1539  | 41.7153   |
| 84  | SYTL2          | 0.3097 | 0.0010 | 150.7972  | 143.3382 | 225.7544  | 660.0771  | 223.8980 | 794.7861  |
| 85  | ANO4           | 0.3153 | 0.0092 | 107.8239  | 125.6056 | 22.2575   | 318.4292  | 143.5022 | 349.0911  |
| 86  | RP11-169D4.1   | 0.3159 | 0.0162 | 13.2827   | 13.2994  | 3.1796    | 30.6820   | 18.1539  | 45.3745   |
| 87  | HTR2B          | 0.3188 | 0.0000 | 32.0346   | 28.8154  | 54.0539   | 130.1911  | 89.0405  | 141.2465  |
| 88  | KIAA1210       | 0.3198 | 0.0121 | 32.8160   | 11.8217  | 6.3593    | 55.5593   | 38.0367  | 65.8663   |
| 89  | ACOT11         | 0.3223 | 0.0017 | 41.4106   | 26.5988  | 34.9760   | 145.1175  | 49.2748  | 125.1459  |
| 90  | GRIN2C         | 0.3250 | 0.0234 | 46.0986   | 34.7263  | 108.1078  | 336.6725  | 49.2748  | 195.4032  |
| 91  | ARRDC4         | 0.3258 | 0.0000 | 107.0426  | 91.6182  | 82.6706   | 281.9425  | 232.5427 | 349.0911  |
| 92  | EDA2R          | 0.3263 | 0.0000 | 53.9119   | 68.7137  | 60.4132   | 199.0182  | 159.9271 | 201.9898  |
| 93  | CPEB1          | 0.3288 | 0.0310 | 10.1573   | 15.5160  | 3.1796    | 37.3159   | 13.8315  | 36.5924   |
| 94  | COL27A1        | 0.3292 | 0.0009 | 386.7596  | 136.6885 | 333.8622  | 1151.8180 | 591.2982 | 861.3842  |
| 95  | MED12L         | 0.3323 | 0.0003 | 30.4720   | 26.5988  | 25.4371   | 101.9968  | 51.8683  | 94.4083   |
| 96  | CLRN1          | 0.3340 | 0.0222 | 26.5653   | 11.8217  | 104.9281  | 122.7279  | 146.0956 | 160.2745  |
| 97  | DHFR           | 0.3361 | 0.0019 | 34.3786   | 28.8154  | 15.8982   | 73.8026   | 51.0038  | 110.5089  |
| 98  | AC011242.6     | 0.3388 | 0.0032 | 5.4693    | 12.5606  | 12.7186   | 34.8282   | 25.9341  | 30.0057   |
| 99  | RELL2          | 0.3440 | 0.0272 | 37.5040   | 11.0829  | 28.6168   | 132.6788  | 30.2565  | 61.4752   |
| 100 | INPP4B         | 0.3456 | 0.0002 | 49.2239   | 73.1468  | 79.4910   | 185.7504  | 130.5351 | 267.8561  |
| 101 | ZNF92          | 0.3463 | 0.0000 | 37.5040   | 46.5480  | 44.5150   | 97.0214   | 113.2457 | 161.0064  |
| 102 | NHSL2          | 0.3465 | 0.0320 | 7.8133    | 8.1274   | 3.1796    | 24.0480   | 12.1026  | 19.0280   |
| 103 | AF131215.2     | 0.3502 | 0.0074 | 15.6267   | 22.1657  | 6.3593    | 36.4867   | 35.4433  | 54.1567   |



## Transcriptome of primary aldosteronism adrenal glands

|     |                |        |        |           |           |           |            |            |            |
|-----|----------------|--------|--------|-----------|-----------|-----------|------------|------------|------------|
| 104 | CBX3P9         | 0.3554 | 0.0197 | 15.6267   | 17.7326   | 3.1796    | 31.5112    | 25.9341    | 45.3745    |
| 105 | SLC5A8         | 0.3569 | 0.0126 | 35.1600   | 35.4651   | 12.7186   | 87.8997    | 38.0367    | 107.5815   |
| 106 | BHLHE41        | 0.3592 | 0.0003 | 71.1013   | 142.5993  | 114.4670  | 311.7952   | 216.1178   | 385.6835   |
| 107 | DSP            | 0.3616 | 0.0051 | 364.8823  | 175.1090  | 286.1676  | 883.1434   | 325.0411   | 1076.5473  |
| 108 | PGM5-AS1       | 0.3619 | 0.0004 | 71.1013   | 62.0640   | 79.4910   | 260.3822   | 110.6523   | 216.6268   |
| 109 | ADAMTSL1       | 0.3622 | 0.0001 | 103.1359  | 130.7776  | 193.9580  | 503.3503   | 274.0373   | 403.9797   |
| 110 | RP11-284F21.10 | 0.3624 | 0.0116 | 27.3466   | 25.8600   | 28.6168   | 110.2893   | 27.6631    | 87.8217    |
| 111 | VSNL1          | 0.3645 | 0.0005 | 215.6478  | 162.5485  | 305.2455  | 723.0996   | 370.8581   | 780.8810   |
| 112 | HSD3BP1        | 0.3661 | 0.0446 | 6.2507    | 6.6497    | 3.1796    | 14.9264    | 17.2894    | 11.7096    |
| 113 | GYLTL1B        | 0.3718 | 0.0459 | 32.0346   | 8.8663    | 15.8982   | 72.1441    | 19.8828    | 60.7433    |
| 114 | ZNF469         | 0.3727 | 0.0130 | 15.6267   | 17.7326   | 28.6168   | 82.9243    | 23.3407    | 60.0115    |
| 115 | RP1-20N2.6     | 0.3733 | 0.0169 | 21.8773   | 22.1657   | 3.1796    | 43.9499    | 37.1723    | 45.3745    |
| 116 | SLC37A2        | 0.3747 | 0.0389 | 735.2339  | 278.5490  | 184.4191  | 1618.6816  | 354.4331   | 1224.3804  |
| 117 | SYN2           | 0.3759 | 0.0242 | 14.8453   | 32.5097   | 44.5150   | 97.0214    | 30.2565    | 117.0956   |
| 118 | PRRX1          | 0.3770 | 0.0000 | 85.1652   | 87.9239   | 101.7485  | 208.9691   | 236.0006   | 283.9567   |
| 119 | LINC00941      | 0.3773 | 0.0462 | 7.0320    | 10.3440   | 3.1796    | 21.5603    | 19.0184    | 13.9051    |
| 120 | ZSCAN20        | 0.3788 | 0.0133 | 11.7200   | 8.1274    | 9.5389    | 27.3650    | 17.2894    | 32.9331    |
| 121 | SLC12A1        | 0.3804 | 0.0279 | 7.0320    | 13.2994   | 44.5150   | 58.0470    | 36.3078    | 76.1121    |
| 122 | SMC4           | 0.3810 | 0.0160 | 65.6319   | 110.0896  | 22.2575   | 158.3853   | 127.0772   | 234.1911   |
| 123 | ANKS1B         | 0.3819 | 0.0081 | 28.1280   | 29.5543   | 31.7964   | 77.1196    | 37.1723    | 120.0229   |
| 124 | BMP4           | 0.3833 | 0.0000 | 71.8826   | 48.0257   | 60.4132   | 173.3117   | 138.3154   | 158.8108   |
| 125 | ZNF214         | 0.3839 | 0.0190 | 9.3760    | 9.6051    | 6.3593    | 27.3650    | 18.1539    | 20.4917    |
| 126 | NOV            | 0.3878 | 0.0080 | 7765.6639 | 9418.9451 | 2413.3468 | 18095.7329 | 13570.4665 | 18875.0719 |
| 127 | NRK            | 0.3896 | 0.0000 | 417.2316  | 421.1483  | 292.5269  | 791.0975   | 939.6800   | 1171.6874  |
| 128 | VCAN           | 0.3911 | 0.0344 | 503.1781  | 1285.6106 | 225.7544  | 1777.8962  | 1022.6693  | 2350.6933  |
| 129 | AC007392.4     | 0.3915 | 0.0376 | 9.3760    | 3.6943    | 12.7186   | 21.5603    | 12.1026    | 32.2013    |
| 130 | RP11-215H22.1  | 0.3930 | 0.0007 | 23.4400   | 15.5160   | 25.4371   | 47.2668    | 58.7840    | 57.8159    |
| 131 | IQGAP2         | 0.3935 | 0.0013 | 171.8932  | 410.0655  | 340.2215  | 746.3184   | 609.4521   | 987.9938   |
| 132 | TMEM132A       | 0.3935 | 0.0024 | 114.0745  | 60.5862   | 73.1317   | 299.3566   | 145.2311   | 185.1573   |
| 133 | FZD7           | 0.3941 | 0.0054 | 14.0640   | 14.7771   | 9.5389    | 32.3405    | 32.8499    | 32.2013    |
| 134 | ZNF629         | 0.3951 | 0.0089 | 46.8800   | 48.0257   | 19.0778   | 123.5572   | 58.7840    | 106.1178   |
| 135 | ZFHX4-AS1      | 0.3951 | 0.0495 | 5.4693    | 13.2994   | 6.3593    | 24.8773    | 13.8315    | 24.8828    |
| 136 | CYB5RL         | 0.3960 | 0.0471 | 39.0666   | 33.9874   | 3.1796    | 75.4611    | 47.5459    | 69.5255    |
| 137 | NR1D2          | 0.3968 | 0.0026 | 134.3892  | 177.3256  | 98.5688   | 322.5754   | 210.0665   | 501.3154   |
| 138 | ESR2           | 0.3978 | 0.0062 | 48.4426   | 43.5925   | 50.8742   | 150.9222   | 55.3261    | 152.9561   |
| 139 | IGSF10         | 0.4004 | 0.0339 | 57.8186   | 149.2491  | 28.6168   | 215.6031   | 127.0772   | 245.9007   |
| 140 | CHML           | 0.4007 | 0.0088 | 37.5040   | 57.6308   | 15.8982   | 80.4365    | 84.7182    | 111.9726   |
| 141 | SNRPN          | 0.4015 | 0.0349 | 13.2827   | 12.5606   | 9.5389    | 14.0971    | 38.9012    | 35.1287    |
| 142 | ETV1           | 0.4039 | 0.0004 | 178.9251  | 287.4153  | 228.9341  | 584.6161   | 389.0120   | 747.9479   |
| 143 | SLC39A10       | 0.4053 | 0.0093 | 178.1438  | 254.1667  | 155.8024  | 582.1283   | 207.4731   | 661.5899   |
| 144 | C15orf27       | 0.4069 | 0.0173 | 41.4106   | 14.7771   | 60.4132   | 128.5326   | 66.5643    | 91.4809    |
| 145 | ZNF792         | 0.4075 | 0.0212 | 10.1573   | 5.1720    | 15.8982   | 26.5358    | 16.4249    | 33.6650    |
| 146 | SERINC5        | 0.4113 | 0.0111 | 44.5360   | 64.2805   | 104.9281  | 212.2861   | 85.5826    | 221.7497   |
| 147 | P2RX7          | 0.4132 | 0.0430 | 27.3466   | 28.8154   | 9.5389    | 73.8026    | 25.9341    | 59.2796    |
| 148 | ADAMTS3        | 0.4158 | 0.0235 | 15.6267   | 12.5606   | 6.3593    | 26.5358    | 25.0697    | 31.4694    |
| 149 | TMEM30B        | 0.4159 | 0.0262 | 32.0346   | 14.0383   | 34.9760   | 64.6809    | 32.8499    | 97.3357    |
| 150 | ARHGAP20       | 0.4189 | 0.0040 | 32.8160   | 37.6817   | 15.8982   | 70.4856    | 59.6485    | 76.1121    |
| 151 | AL390877.1     | 0.4198 | 0.0220 | 19.5333   | 36.2040   | 12.7186   | 43.9499    | 46.6814    | 72.4529    |
| 152 | DDR1           | 0.4218 | 0.0095 | 512.5541  | 346.5238  | 381.5568  | 1452.8331  | 441.7447   | 1046.5415  |
| 153 | DACH1          | 0.4236 | 0.0209 | 75.7893   | 134.4719  | 50.8742   | 230.5295   | 106.3299   | 279.5656   |
| 154 | VAT1L          | 0.4245 | 0.0304 | 188.3011  | 752.8950  | 267.0898  | 1051.4797  | 644.0309   | 1151.1957  |
| 155 | ENC1           | 0.4250 | 0.0184 | 16.4080   | 48.0257   | 41.3353   | 107.8015   | 56.1906    | 84.8943    |
| 156 | AGTR1          | 0.4255 | 0.0017 | 411.7622  | 369.4283  | 228.9341  | 903.8745   | 510.0379   | 960.1836   |

## Transcriptome of primary aldosteronism adrenal glands

|     |               |        |        |            |            |            |            |            |            |
|-----|---------------|--------|--------|------------|------------|------------|------------|------------|------------|
| 157 | CPVL          | 0.4286 | 0.0110 | 73.4453    | 65.0194    | 22.2575    | 99.5091    | 135.7220   | 139.7828   |
| 158 | DUSP4         | 0.4292 | 0.0045 | 54.6933    | 73.8857    | 152.6227   | 224.7248   | 182.4034   | 248.0962   |
| 159 | ZNF711        | 0.4303 | 0.0001 | 277.3730   | 417.4540   | 375.1975   | 682.4667   | 803.0936   | 1001.1670  |
| 160 | TMEM200A      | 0.4336 | 0.0083 | 126.5759   | 232.0010   | 327.5029   | 542.3247   | 343.1950   | 696.7186   |
| 161 | ZKSCAN4       | 0.4349 | 0.0327 | 30.4720    | 14.0383    | 9.5389     | 43.1206    | 42.3591    | 38.7879    |
| 162 | KLHL5         | 0.4350 | 0.0312 | 126.5759   | 220.9182   | 66.7724    | 325.0631   | 172.0297   | 455.2090   |
| 163 | PEG10         | 0.4372 | 0.0006 | 3674.6069  | 6143.5934  | 6887.1005  | 12262.0109 | 10376.2460 | 15572.9772 |
| 164 | KCNJ5         | 0.4382 | 0.0129 | 958.6950   | 743.2898   | 1748.8021  | 3307.0197  | 1441.0732  | 3126.4514  |
| 165 | AXIN2         | 0.4390 | 0.0012 | 72.6639    | 47.2868    | 57.2335    | 171.6532   | 119.2970   | 112.7045   |
| 166 | SYTL5         | 0.4394 | 0.0004 | 119.5439   | 166.9816   | 181.2395   | 271.9916   | 447.7960   | 344.7000   |
| 167 | LRRN3         | 0.4411 | 0.0072 | 141.4212   | 305.8867   | 139.9042   | 411.3044   | 348.3818   | 571.5727   |
| 168 | C14orf37      | 0.4428 | 0.0092 | 63.2879    | 76.1022    | 92.2096    | 174.9702   | 93.3629    | 254.6828   |
| 169 | MYEF2         | 0.4433 | 0.0012 | 201.5838   | 233.4787   | 120.8263   | 435.3524   | 327.6345   | 491.0695   |
| 170 | PTPN13        | 0.4491 | 0.0153 | 150.7972   | 225.3513   | 85.8503    | 419.5968   | 210.9309   | 398.1249   |
| 171 | COL4A3        | 0.4500 | 0.0021 | 383.6343   | 352.4346   | 225.7544   | 808.5116   | 477.1880   | 851.8702   |
| 172 | RP11-134E15.2 | 0.4505 | 0.0352 | 6.2507     | 8.8663     | 9.5389     | 17.4141    | 19.0184    | 18.2962    |
| 173 | BAMBI         | 0.4508 | 0.0005 | 369.5703   | 354.6512   | 232.1137   | 851.6322   | 548.9391   | 720.8695   |
| 174 | C3orf52       | 0.4521 | 0.0361 | 11.7200    | 4.4331     | 15.8982    | 28.1942    | 20.7473    | 21.9554    |
| 175 | PIGM          | 0.4543 | 0.0089 | 46.8800    | 66.4971    | 31.7964    | 106.9723   | 78.6669    | 133.9280   |
| 176 | QPCT          | 0.4546 | 0.0144 | 843.0578   | 2136.0347  | 1602.5386  | 3425.6014  | 2098.0712  | 4555.0171  |
| 177 | ANKRD50       | 0.4546 | 0.0488 | 42.9733    | 90.1405    | 25.4371    | 94.5337    | 82.9892    | 171.2523   |
| 178 | NBEA          | 0.4557 | 0.0413 | 132.8265   | 248.2558   | 85.8503    | 373.9884   | 167.7074   | 483.0192   |
| 179 | PGR           | 0.4557 | 0.0018 | 82.0399    | 85.7074    | 79.4910    | 174.9702   | 125.3483   | 242.2414   |
| 180 | KCTD14        | 0.4573 | 0.0414 | 31.2533    | 25.1211    | 9.5389     | 60.5347    | 34.5788    | 49.0338    |
| 181 | C1orf85       | 0.4576 | 0.0317 | 192.2078   | 144.8159   | 168.5209   | 609.4933   | 151.2824   | 343.9682   |
| 182 | SALL2         | 0.4584 | 0.0151 | 20.3146    | 26.5988    | 15.8982    | 49.7546    | 34.5788    | 52.6930    |
| 183 | HHIP          | 0.4612 | 0.0067 | 39.0666    | 61.3251    | 101.7485   | 115.2647   | 168.5719   | 154.4198   |
| 184 | RIMS2         | 0.4635 | 0.0076 | 739.9219   | 582.2191   | 868.0417   | 1663.4607  | 865.3355   | 2197.0054  |
| 185 | FAM135B       | 0.4636 | 0.0121 | 53.1306    | 90.1405    | 38.1557    | 134.3373   | 101.1431   | 155.8835   |
| 186 | ATP2B1        | 0.4639 | 0.0064 | 90.6346    | 166.9816   | 111.2874   | 239.6511   | 196.2349   | 359.3370   |
| 187 | YEATS4        | 0.4656 | 0.0364 | 57.0373    | 84.9685    | 19.0778    | 102.8261   | 115.8391   | 127.3414   |
| 188 | HOXD3         | 0.4656 | 0.0162 | 62.5066    | 33.2486    | 38.1557    | 131.8496   | 70.8866    | 84.8943    |
| 189 | TXNIP         | 0.4675 | 0.0185 | 4141.8437  | 2189.2324  | 2120.8200  | 7420.0632  | 3209.7810  | 7447.2774  |
| 190 | HSD3B2        | 0.4677 | 0.0000 | 23139.9440 | 27254.9457 | 25853.6537 | 58147.3233 | 44676.7283 | 60192.9708 |
| 191 | OXCT1         | 0.4679 | 0.0168 | 156.2665   | 190.6250   | 391.0957   | 594.5670   | 342.3305   | 640.3663   |
| 192 | PPP1R3C       | 0.4694 | 0.0203 | 39.8480    | 43.5925    | 108.1078   | 140.1420   | 95.9563    | 171.9841   |
| 193 | HFE           | 0.4705 | 0.0422 | 80.4772    | 91.6182    | 22.2575    | 146.7759   | 104.6010   | 161.7382   |
| 194 | ZNF397        | 0.4715 | 0.0497 | 134.3892   | 144.0771   | 31.7964    | 194.0428   | 195.3705   | 268.5879   |
| 195 | CHDH          | 0.4728 | 0.0033 | 39.0666    | 39.1594    | 54.0539    | 122.7279   | 74.3445    | 82.6987    |
| 196 | CDK20         | 0.4732 | 0.0141 | 290.6557   | 171.4148   | 136.7245   | 587.1038   | 294.7846   | 383.4879   |
| 197 | FAT1          | 0.4746 | 0.0480 | 27.3466    | 19.2103    | 12.7186    | 43.9499    | 26.7986    | 54.1567    |
| 198 | ZNF844        | 0.4748 | 0.0326 | 35.9413    | 43.5925    | 12.7186    | 55.5593    | 64.8353    | 73.9166    |
| 199 | DOCK3         | 0.4751 | 0.0272 | 82.0399    | 70.9302    | 190.7784   | 287.7472   | 150.4180   | 285.4204   |
| 200 | ZNF772        | 0.4764 | 0.0209 | 35.9413    | 48.7645    | 19.0778    | 58.8762    | 72.6156    | 86.3580    |
| 201 | TLR6          | 0.4806 | 0.0295 | 17.1893    | 36.2040    | 22.2575    | 39.8036    | 60.5130    | 57.0841    |
| 202 | SYDE2         | 0.4809 | 0.0425 | 11.7200    | 28.8154    | 25.4371    | 32.3405    | 44.0880    | 60.7433    |
| 203 | CUBN          | 0.4820 | 0.0025 | 57.0373    | 48.7645    | 38.1557    | 87.0705    | 95.9563    | 115.6319   |
| 204 | KLHL7         | 0.4839 | 0.0322 | 260.1837   | 312.5364   | 101.7485   | 500.8626   | 316.3964   | 576.6956   |
| 205 | NFASC         | 0.4845 | 0.0433 | 497.7088   | 282.2433   | 181.2395   | 864.9001   | 349.2463   | 769.9033   |
| 206 | ITGA1         | 0.4877 | 0.0151 | 951.6630   | 1287.8272  | 620.0298   | 1837.6017  | 1288.0619  | 2737.8405  |
| 207 | CPB1          | 0.4882 | 0.0232 | 664.9140   | 390.8552   | 658.1855   | 1514.1971  | 586.9758   | 1409.5378  |
| 208 | EML6          | 0.4903 | 0.0135 | 85.9466    | 101.9622   | 174.8802   | 279.4548   | 158.1982   | 302.2529   |
| 209 | KCNK2         | 0.4906 | 0.0008 | 471.9248   | 749.2007   | 499.2035   | 1099.5757  | 1037.3653  | 1369.2862  |
| 210 | ZNF43         | 0.4911 | 0.0300 | 53.1306    | 75.3634    | 25.4371    | 89.5582    | 95.0918    | 128.8051   |

## Transcriptome of primary aldosteronism adrenal glands

|     |               |        |        |          |           |           |           |           |           |
|-----|---------------|--------|--------|----------|-----------|-----------|-----------|-----------|-----------|
| 211 | ABHD2         | 0.4912 | 0.0148 | 625.0660 | 903.6217  | 480.1257  | 1488.4905 | 814.3317  | 1786.4391 |
| 212 | ANK2          | 0.4923 | 0.0208 | 246.1197 | 248.2558  | 298.8862  | 631.0537  | 255.8834  | 724.5288  |
| 213 | SYNGAP1       | 0.4933 | 0.0269 | 182.8318 | 99.0068   | 133.5449  | 413.7921  | 162.5206  | 265.6605  |
| 214 | SV2B          | 0.4936 | 0.0233 | 28.1280  | 34.7263   | 19.0778   | 63.0224   | 41.4946   | 61.4752   |
| 215 | UGCG          | 0.4939 | 0.0009 | 823.5245 | 1332.8975 | 1297.2932 | 2308.6115 | 1989.1479 | 2694.6615 |
| 216 | RORA          | 0.4944 | 0.0185 | 979.0097 | 1227.9798 | 848.9639  | 2054.8633 | 1097.8782 | 3028.3838 |
| 217 | RP11-617D20.1 | 0.4953 | 0.0157 | 50.0053  | 52.4588   | 41.3353   | 119.4109  | 59.6485   | 111.2408  |
| 218 | JAM2          | 0.4962 | 0.0135 | 179.7065 | 387.8998  | 174.8802  | 456.0835  | 541.1589  | 499.1198  |
| 219 | SAMD3         | 0.4974 | 0.0298 | 20.3146  | 16.2548   | 54.0539   | 55.5593   | 71.7511   | 54.8885   |
| 220 | RBM43         | 0.4978 | 0.0432 | 103.1359 | 158.8542  | 63.5928   | 173.3117  | 152.1469  | 328.5994  |
| 221 | TMEM87B       | 0.4987 | 0.0066 | 192.9891 | 219.4404  | 127.1856  | 354.9159  | 264.5281  | 462.5274  |
| 222 | MCTP2         | 0.4990 | 0.0281 | 48.4426  | 39.1594   | 95.3892   | 144.2882  | 76.0735   | 146.3694  |
| 223 | OXR1          | 0.4994 | 0.0246 | 445.3595 | 795.7487  | 413.3532  | 1116.1606 | 663.0493  | 1533.9518 |
| 224 | PHF7          | 0.5005 | 0.0086 | 28.9093  | 22.1657   | 28.6168   | 58.0470   | 44.0880   | 57.0841   |
| 225 | ATRNL1        | 0.5006 | 0.0095 | 257.8397 | 292.5873  | 187.5988  | 505.8380  | 315.5319  | 652.8077  |
| 226 | NFATC3        | 0.5010 | 0.0480 | 30.4720  | 38.4205   | 15.8982   | 63.0224   | 38.9012   | 67.3299   |
| 227 | SLIT2         | 0.5021 | 0.0014 | 438.3275 | 503.1614  | 365.6586  | 893.0943  | 644.0309  | 1066.3014 |
| 228 | SLC4A2        | 0.5022 | 0.0097 | 260.9651 | 184.7142  | 136.7245  | 505.0088  | 298.2425  | 356.4096  |
| 229 | RP11-2E17.1   | 0.5032 | 0.0422 | 92.9786  | 144.0771  | 305.2455  | 429.5477  | 260.2058  | 387.8790  |
| 230 | ZFP62         | 0.5047 | 0.0224 | 114.0745 | 125.6056  | 44.5150   | 184.9211  | 179.8100  | 198.3306  |
| 231 | ACSS3         | 0.5054 | 0.0046 | 344.5676 | 469.9129  | 238.4730  | 661.7356  | 604.2653  | 817.4734  |
| 232 | FRK           | 0.5059 | 0.0443 | 28.9093  | 59.8474   | 47.6946   | 87.0705   | 55.3261   | 127.3414  |
| 233 | WEE1          | 0.5060 | 0.0285 | 56.2559  | 34.7263   | 63.5928   | 101.9968  | 62.2419   | 141.2465  |
| 234 | ARHGAP42      | 0.5060 | 0.0194 | 20.3146  | 39.8983   | 34.9760   | 62.1932   | 52.7327   | 73.1847   |
| 235 | MICAL3        | 0.5063 | 0.0450 | 157.0478 | 93.0959   | 101.7485  | 291.0642  | 109.7878  | 294.2026  |
| 236 | MKL2          | 0.5064 | 0.0382 | 117.1999 | 149.2491  | 76.3114   | 243.7973  | 122.7549  | 310.3032  |
| 237 | ZFX4          | 0.5069 | 0.0055 | 132.8265 | 220.9182  | 149.4431  | 344.1357  | 253.2900  | 395.1975  |
| 238 | FAM175A       | 0.5072 | 0.0328 | 25.7840  | 33.9874   | 19.0778   | 58.8762   | 38.0367   | 58.5478   |
| 239 | CCND1         | 0.5078 | 0.0037 | 281.2797 | 328.7912  | 537.3592  | 755.4400  | 656.1335  | 848.2109  |
| 240 | PEX12         | 0.5081 | 0.0015 | 46.8800  | 52.4588   | 44.5150   | 94.5337   | 89.0405   | 99.5312   |
| 241 | CKAP2         | 0.5088 | 0.0099 | 58.5999  | 86.4462   | 54.0539   | 121.0694  | 106.3299  | 163.9338  |
| 242 | ASTN1         | 0.5096 | 0.0157 | 200.8025 | 390.8552  | 505.5628  | 784.4635  | 592.1627  | 776.4899  |
| 243 | HHAT          | 0.5107 | 0.0338 | 72.6639  | 59.8474   | 25.4371   | 111.1185  | 84.7182   | 113.4363  |
| 244 | USP34         | 0.5112 | 0.0459 | 225.0238 | 410.0655  | 143.0838  | 446.9618  | 373.4515  | 701.8415  |
| 245 | LRRC16A       | 0.5119 | 0.0025 | 67.9759  | 89.4017   | 57.2335   | 129.3619  | 143.5022  | 146.3694  |
| 246 | ZNF480        | 0.5140 | 0.0478 | 43.7546  | 60.5862   | 28.6168   | 53.0715   | 104.6010  | 100.9949  |
| 247 | TSPAN13       | 0.5141 | 0.0104 | 293.7810 | 470.6517  | 594.5927  | 841.6813  | 683.7966  | 1118.2626 |
| 248 | WLS           | 0.5164 | 0.0035 | 464.8929 | 541.5820  | 343.4011  | 990.1157  | 644.0309  | 979.9434  |
| 249 | GPNMB         | 0.5170 | 0.0242 | 114.8559 | 186.1919  | 111.2874  | 269.5039  | 169.4363  | 358.6051  |
| 250 | TSR1          | 0.5183 | 0.0404 | 100.0106 | 115.2616  | 38.1557   | 167.5070  | 134.8575  | 186.6210  |
| 251 | C6orf211      | 0.5194 | 0.0195 | 92.1972  | 175.8479  | 114.4670  | 228.8710  | 184.1323  | 323.4765  |
| 252 | COL4A5        | 0.5195 | 0.0360 | 57.8186  | 77.5800   | 85.8503   | 165.0193  | 73.4800   | 187.3529  |
| 253 | SRPX          | 0.5198 | 0.0051 | 287.5304 | 223.8736  | 235.2934  | 594.5670  | 325.9056  | 515.9523  |
| 254 | LMO3          | 0.5210 | 0.0269 | 41.4106  | 84.2297   | 76.3114   | 89.5582   | 153.8758  | 144.1739  |
| 255 | ANKRD26       | 0.5213 | 0.0191 | 41.4106  | 58.3697   | 54.0539   | 67.1687   | 97.6852   | 130.2688  |
| 256 | ZNF320        | 0.5217 | 0.0324 | 86.7279  | 128.5611  | 47.6946   | 149.2637  | 152.1469  | 202.7217  |
| 257 | EGLN1         | 0.5225 | 0.0044 | 368.7890 | 547.4928  | 346.5808  | 774.5126  | 650.9467  | 991.6530  |
| 258 | FLRT2         | 0.5236 | 0.0295 | 155.4852 | 350.9569  | 149.4431  | 371.5007  | 434.8289  | 446.4268  |
| 259 | RAB30         | 0.5242 | 0.0211 | 200.8025 | 226.8290  | 193.9580  | 346.6234  | 246.3742  | 592.7963  |
| 260 | ETV4          | 0.5260 | 0.0285 | 26.5653  | 24.3823   | 19.0778   | 52.2423   | 40.6301   | 40.2516   |
| 261 | ZNF551        | 0.5287 | 0.0446 | 19.5333  | 22.9046   | 15.8982   | 29.8527   | 38.0367   | 42.4471   |
| 262 | REST          | 0.5287 | 0.0351 | 99.2292  | 152.2045  | 54.0539   | 170.8240  | 191.0481  | 215.8949  |
| 263 | KIF2A         | 0.5292 | 0.0318 | 46.8800  | 65.7582   | 34.9760   | 75.4611   | 81.2603   | 122.2185  |
| 264 | RP11-597D13.9 | 0.5296 | 0.0424 | 50.7866  | 61.3251   | 28.6168   | 63.8517   | 89.9050   | 111.9726  |

## Transcriptome of primary aldosteronism adrenal glands

|     |            |        |        |           |           |           |           |           |           |
|-----|------------|--------|--------|-----------|-----------|-----------|-----------|-----------|-----------|
| 265 | FAM13C     | 0.5308 | 0.0345 | 85.9466   | 88.6628   | 47.6946   | 163.3608  | 90.7695   | 164.6656  |
| 266 | CCT6P1     | 0.5313 | 0.0232 | 38.2853   | 31.0320   | 22.2575   | 52.2423   | 57.9196   | 62.2070   |
| 267 | ACPL2      | 0.5313 | 0.0270 | 60.9439   | 81.2742   | 47.6946   | 134.3373  | 80.3958   | 142.7102  |
| 268 | ZNF175     | 0.5329 | 0.0403 | 41.4106   | 42.1148   | 22.2575   | 55.5593   | 58.7840   | 84.1624   |
| 269 | ZNF510     | 0.5330 | 0.0258 | 61.7253   | 100.4845  | 50.8742   | 120.2402  | 114.1102  | 165.3975  |
| 270 | DAB2       | 0.5343 | 0.0100 | 1505.6278 | 1200.6421 | 2267.0834 | 3022.5894 | 2531.1712 | 3755.1081 |
| 271 | TMEM2      | 0.5380 | 0.0415 | 78.1333   | 81.2742   | 31.7964   | 137.6543  | 102.8721  | 114.9000  |
| 272 | MGA        | 0.5386 | 0.0065 | 158.6105  | 223.1347  | 127.1856  | 276.1378  | 313.8030  | 354.9459  |
| 273 | SCRN1      | 0.5404 | 0.0161 | 238.3064  | 423.3649  | 435.6107  | 732.2213  | 495.3419  | 802.8364  |
| 274 | SERBP1P1   | 0.5406 | 0.0262 | 42.1920   | 55.4143   | 28.6168   | 80.4365   | 67.4287   | 85.6261   |
| 275 | SLC30A1    | 0.5444 | 0.0301 | 201.5838  | 399.7215  | 308.4251  | 471.0098  | 428.7776  | 771.3670  |
| 276 | WDFY3      | 0.5448 | 0.0391 | 330.5037  | 472.1294  | 222.5748  | 592.9085  | 430.5066  | 858.4568  |
| 277 | LRRCS8D    | 0.5459 | 0.0013 | 269.5597  | 301.4535  | 317.9640  | 524.9106  | 442.6092  | 660.8580  |
| 278 | TRUB1      | 0.5476 | 0.0443 | 251.5891  | 329.5301  | 219.3952  | 526.5691  | 261.9347  | 673.2995  |
| 279 | CEP85L     | 0.5482 | 0.0294 | 145.3278  | 216.4850  | 111.2874  | 275.3086  | 214.3888  | 373.2421  |
| 280 | TMEM246    | 0.5501 | 0.0347 | 81.2586   | 130.0388  | 168.5209  | 272.8208  | 151.2824  | 266.3924  |
| 281 | CCDC113    | 0.5510 | 0.0105 | 41.4106   | 39.8983   | 34.9760   | 76.2903   | 67.4287   | 67.3299   |
| 282 | PLXNC1     | 0.5522 | 0.0429 | 72.6639   | 124.1279  | 50.8742   | 150.0929  | 132.2641  | 166.1293  |
| 283 | TNIK       | 0.5540 | 0.0113 | 75.0079   | 113.7839  | 120.8263  | 190.7258  | 147.8245  | 220.2860  |
| 284 | NTN4       | 0.5551 | 0.0021 | 204.7091  | 231.2621  | 187.5988  | 405.4997  | 299.9715  | 417.8848  |
| 285 | ZNF12      | 0.5589 | 0.0335 | 129.7012  | 183.9753  | 92.2096   | 175.7994  | 267.9860  | 282.4930  |
| 286 | WDR3       | 0.5592 | 0.0088 | 204.7091  | 222.3959  | 165.3413  | 365.6960  | 261.9347  | 431.7899  |
| 287 | ELF4       | 0.5593 | 0.0398 | 47.6613   | 25.1211   | 57.2335   | 93.7044   | 64.8353   | 73.9166   |
| 288 | SOX13      | 0.5624 | 0.0259 | 192.2078  | 135.2108  | 104.9281  | 325.0631  | 206.6086  | 237.1185  |
| 289 | PDCD4      | 0.5632 | 0.0016 | 203.1465  | 246.0393  | 197.1377  | 361.5498  | 344.0595  | 442.0357  |
| 290 | HMGNS      | 0.5641 | 0.0271 | 96.1039   | 130.7776  | 89.0299   | 147.6052  | 159.9271  | 252.4873  |
| 291 | SNCAIP     | 0.5648 | 0.0224 | 24.2213   | 20.6880   | 44.5150   | 50.5838   | 53.5972   | 54.1567   |
| 292 | TMEM38B    | 0.5659 | 0.0470 | 136.7332  | 235.6953  | 139.9042  | 291.8934  | 205.7441  | 407.6389  |
| 293 | ZNF449     | 0.5665 | 0.0280 | 132.8265  | 144.8159  | 79.4910   | 180.7749  | 183.2679  | 266.3924  |
| 294 | ZNF75D     | 0.5689 | 0.0107 | 394.5729  | 295.5427  | 295.7065  | 635.1999  | 419.2685  | 678.4224  |
| 295 | FAS        | 0.5713 | 0.0171 | 167.9865  | 179.5422  | 111.2874  | 207.3107  | 306.0228  | 289.8115  |
| 296 | GPRC5B     | 0.5731 | 0.0473 | 222.6798  | 181.0199  | 349.7604  | 553.1048  | 280.0886  | 481.5555  |
| 297 | H1FO       | 0.5735 | 0.0200 | 396.1356  | 469.9129  | 292.5269  | 835.8766  | 487.5617  | 696.7186  |
| 298 | TPR        | 0.5736 | 0.0335 | 427.3889  | 502.4226  | 228.9341  | 608.6641  | 612.9100  | 798.4453  |
| 299 | FUT8       | 0.5774 | 0.0333 | 58.5999   | 84.2297   | 57.2335   | 126.8741  | 86.4471   | 133.1962  |
| 300 | PHLPP1     | 0.5783 | 0.0103 | 396.1356  | 336.1798  | 454.6885  | 781.1466  | 492.7485  | 778.6855  |
| 301 | PFKFB2     | 0.5800 | 0.0188 | 144.5465  | 133.7331  | 197.1377  | 284.4302  | 197.0994  | 338.1134  |
| 302 | ERV3-1     | 0.5800 | 0.0429 | 232.8371  | 289.6318  | 343.4011  | 583.7868  | 291.3267  | 617.6791  |
| 303 | MIEF1      | 0.5808 | 0.0014 | 136.7332  | 130.0388  | 139.9042  | 246.2851  | 206.6086  | 247.3644  |
| 304 | LDLRAD4    | 0.5823 | 0.0145 | 92.9786   | 135.9496  | 89.0299   | 166.6778  | 178.0810  | 201.2580  |
| 305 | LRRFIP1    | 0.5839 | 0.0126 | 217.9918  | 284.4598  | 193.9580  | 381.4516  | 326.7701  | 484.4829  |
| 306 | NOTCH2     | 0.5841 | 0.0141 | 401.6049  | 452.1803  | 381.5568  | 735.5382  | 494.4774  | 884.8033  |
| 307 | SNHG14     | 0.5848 | 0.0070 | 553.1834  | 540.1042  | 553.2574  | 965.2384  | 692.4413  | 1157.7823 |
| 308 | FAM178A    | 0.5853 | 0.0228 | 346.1303  | 540.8431  | 467.4071  | 738.8552  | 579.1956  | 996.0441  |
| 309 | PEAK1      | 0.5866 | 0.0100 | 134.3892  | 150.7268  | 171.7006  | 229.7002  | 220.4401  | 328.5994  |
| 310 | CCDC170    | 0.5879 | 0.0459 | 76.5706   | 79.7965   | 152.6227  | 185.7504  | 130.5351  | 209.3083  |
| 311 | MCOLN3     | 0.5883 | 0.0163 | 941.5057  | 1585.5865 | 972.9699  | 1714.8738 | 2087.6976 | 2147.2398 |
| 312 | ZNF197     | 0.5887 | 0.0053 | 89.0719   | 109.3508  | 98.5688   | 148.4344  | 178.9455  | 177.1070  |
| 313 | NAV3       | 0.5890 | 0.0477 | 94.5412   | 149.2491  | 76.3114   | 165.0193  | 158.1982  | 220.2860  |
| 314 | EXTL2      | 0.5890 | 0.0383 | 378.1649  | 441.8363  | 248.0119  | 596.2255  | 442.6092  | 774.2944  |
| 315 | ST6GALNAC5 | 0.5895 | 0.0222 | 78.1333   | 133.7331  | 104.9281  | 158.3853  | 199.6928  | 179.3026  |
| 316 | COL5A1     | 0.5911 | 0.0413 | 221.1171  | 128.5611  | 165.3413  | 372.3299  | 213.5243  | 285.4204  |
| 317 | TMEM99     | 0.5925 | 0.0370 | 35.9413   | 41.3760   | 31.7964   | 54.7300   | 61.3774   | 68.0618   |

## Transcriptome of primary aldosteronism adrenal glands

|     |              |        |        |           |           |           |           |           |           |
|-----|--------------|--------|--------|-----------|-----------|-----------|-----------|-----------|-----------|
| 318 | RFWD3        | 0.5931 | 0.0265 | 54.6933   | 78.3188   | 60.4132   | 96.1921   | 101.1431  | 128.8051  |
| 319 | IFT81        | 0.5937 | 0.0133 | 86.7279   | 119.6948  | 92.2096   | 174.9702  | 144.3667  | 183.6937  |
| 320 | STAG3L4      | 0.5958 | 0.0475 | 103.1359  | 72.4080   | 101.7485  | 179.1164  | 101.1431  | 185.1573  |
| 321 | RALBP1       | 0.5959 | 0.0206 | 276.5917  | 316.2307  | 254.3712  | 541.4954  | 327.6345  | 552.5447  |
| 322 | UNC119B      | 0.5975 | 0.0265 | 305.5010  | 288.1541  | 317.9640  | 562.2265  | 331.0924  | 632.3160  |
| 323 | SGCD         | 0.5994 | 0.0370 | 66.4133   | 114.5228  | 111.2874  | 137.6543  | 153.0114  | 196.8669  |
| 324 | SGCE         | 0.5999 | 0.0296 | 652.4127  | 705.6081  | 362.4790  | 1029.0901 | 867.0645  | 971.8931  |
| 325 | MYLIP        | 0.6001 | 0.0076 | 121.8879  | 175.8479  | 178.0598  | 253.7482  | 280.0886  | 259.0739  |
| 326 | ZNF671       | 0.6025 | 0.0439 | 43.7546   | 44.3314   | 41.3353   | 56.3885   | 88.1760   | 70.2573   |
| 327 | SRCAP        | 0.6044 | 0.0413 | 432.8582  | 311.7975  | 270.2694  | 712.3194  | 401.9790  | 564.9861  |
| 328 | C3orf58      | 0.6047 | 0.0498 | 50.0053   | 82.7519   | 114.4670  | 124.3864  | 127.0772  | 157.3472  |
| 329 | ZNF117       | 0.6048 | 0.0106 | 848.5271  | 970.1188  | 788.5507  | 1240.5470 | 1232.7357 | 1837.6684 |
| 330 | PGM5         | 0.6051 | 0.0150 | 1043.0789 | 1304.8209 | 1367.2452 | 2385.7311 | 1494.6704 | 2259.2124 |
| 331 | SPRY3        | 0.6060 | 0.0427 | 34.3786   | 25.8600   | 44.5150   | 63.8517   | 47.5459   | 61.4752   |
| 332 | AASS         | 0.6095 | 0.0397 | 106.2612  | 169.9370  | 117.6467  | 193.2135  | 185.8613  | 267.1242  |
| 333 | CCDC66       | 0.6136 | 0.0249 | 84.3839   | 91.6182   | 63.5928   | 116.9232  | 127.9417  | 145.6376  |
| 334 | MED1         | 0.6152 | 0.0372 | 107.0426  | 166.2428  | 111.2874  | 180.7749  | 196.2349  | 248.0962  |
| 335 | SMC3         | 0.6170 | 0.0472 | 130.4825  | 224.6124  | 146.2634  | 233.8464  | 251.5611  | 327.1357  |
| 336 | STK33        | 0.6182 | 0.0186 | 135.9519  | 105.6565  | 101.7485  | 198.1890  | 158.1982  | 199.0624  |
| 337 | SLC12A2      | 0.6186 | 0.0486 | 228.1491  | 390.1163  | 295.7065  | 453.5957  | 391.6054  | 632.3160  |
| 338 | RFX5         | 0.6200 | 0.0256 | 302.3757  | 230.5233  | 225.7544  | 469.3513  | 308.6162  | 445.6950  |
| 339 | NFE2L1       | 0.6227 | 0.0496 | 1584.5424 | 1785.8166 | 1287.7542 | 3094.7335 | 1606.1872 | 2779.5558 |
| 340 | HSP90AB3P    | 0.6238 | 0.0488 | 171.8932  | 215.7462  | 114.4670  | 289.4057  | 226.4914  | 289.0797  |
| 341 | MAGEH1       | 0.6239 | 0.0128 | 139.8585  | 183.9753  | 219.3952  | 312.6245  | 279.2241  | 278.8338  |
| 342 | MMACHC       | 0.6244 | 0.0327 | 33.5973   | 33.9874   | 54.0539   | 65.5102   | 60.5130   | 68.7936   |
| 343 | ZNF521       | 0.6254 | 0.0377 | 184.3945  | 261.5553  | 282.9880  | 432.0354  | 287.8689  | 445.6950  |
| 344 | GIPC2        | 0.6257 | 0.0426 | 318.7837  | 512.0277  | 575.5149  | 669.1988  | 670.8295  | 907.4906  |
| 345 | HAUS3        | 0.6270 | 0.0386 | 81.2586   | 91.6182   | 98.5688   | 111.9478  | 136.5864  | 184.4255  |
| 346 | TGIF1        | 0.6286 | 0.0047 | 144.5465  | 137.4273  | 158.9820  | 216.4323  | 232.5427  | 252.4873  |
| 347 | UTP20        | 0.6290 | 0.0122 | 124.2319  | 137.4273  | 143.0838  | 209.7984  | 184.1323  | 249.5599  |
| 348 | UBE4B        | 0.6292 | 0.0203 | 385.9783  | 430.0146  | 324.3233  | 663.3941  | 466.8144  | 682.0816  |
| 349 | RP5-874C20.3 | 0.6333 | 0.0350 | 84.3839   | 96.0514   | 89.0299   | 109.4600  | 165.9784  | 150.0287  |
| 350 | ANKRA2       | 0.6333 | 0.0492 | 239.0878  | 226.0901  | 235.2934  | 415.4506  | 241.1874  | 449.3542  |
| 351 | ME1          | 0.6334 | 0.0471 | 535.9941  | 670.1430  | 686.8023  | 1019.9684 | 681.2032  | 1287.3193 |
| 352 | DPP10        | 0.6347 | 0.0070 | 203.9278  | 223.8736  | 174.8802  | 306.8198  | 306.0228  | 336.6497  |
| 353 | ACSL1        | 0.6364 | 0.0189 | 418.7942  | 462.5243  | 298.8862  | 594.5670  | 580.9245  | 679.1542  |
| 354 | PHLPP2       | 0.6372 | 0.0420 | 78.9146   | 84.2297   | 66.7724   | 106.1431  | 109.7878  | 144.9058  |
| 355 | DYRK2        | 0.6389 | 0.0284 | 75.0079   | 93.8348   | 76.3114   | 115.2647  | 127.9417  | 140.5147  |
| 356 | MPHOSPH9     | 0.6391 | 0.0451 | 92.9786   | 110.8285  | 76.3114   | 137.6543  | 127.9417  | 172.7159  |
| 357 | RPP40        | 0.6395 | 0.0408 | 75.0079   | 90.1405   | 73.1317   | 130.1911  | 101.1431  | 141.2465  |
| 358 | CCDC14       | 0.6451 | 0.0415 | 273.4664  | 257.1221  | 193.9580  | 351.5989  | 306.8872  | 464.7230  |
| 359 | ZNF641       | 0.6482 | 0.0287 | 413.3249  | 364.9952  | 254.3712  | 513.3012  | 513.4958  | 566.4498  |
| 360 | GID4         | 0.6521 | 0.0301 | 63.2879   | 80.5354   | 76.3114   | 108.6308  | 118.4325  | 110.5089  |
| 361 | FBN2         | 0.6531 | 0.0316 | 242.2131  | 273.3770  | 187.5988  | 352.4281  | 312.9385  | 411.2981  |
| 362 | SYNE2        | 0.6537 | 0.0434 | 445.3595  | 393.0718  | 311.6047  | 655.1017  | 447.7960  | 656.4670  |
| 363 | AIF1L        | 0.6555 | 0.0335 | 68.7573   | 62.0640   | 92.2096   | 123.5572  | 114.9746  | 101.7268  |
| 364 | CCDC93       | 0.6567 | 0.0275 | 510.9915  | 407.8489  | 511.9221  | 845.8275  | 573.1443  | 759.6574  |
| 365 | ANXA5        | 0.6581 | 0.0198 | 1912.7020 | 2831.2989 | 2693.1552 | 3477.0144 | 3858.1343 | 3965.8801 |
| 366 | PFKM         | 0.6588 | 0.0466 | 952.4443  | 862.2458  | 1020.6645 | 1787.0179 | 1020.0758 | 1496.6276 |
| 367 | RUFY3        | 0.6618 | 0.0388 | 613.3460  | 633.9390  | 499.2035  | 871.5340  | 688.1190  | 1079.4747 |
| 368 | DHRS7        | 0.6622 | 0.0113 | 714.1379  | 809.0481  | 677.2633  | 1001.7251 | 1280.2816 | 1040.6868 |
| 369 | APPL2        | 0.6666 | 0.0296 | 350.8183  | 322.8804  | 267.0898  | 488.4239  | 391.6054  | 531.3211  |

D1, D2 and D3: Disease affected-adrenals; C1, C2 and C3: Disease non-affected control tissues.
